# Supplementary material for: Exploring the Reported Strengths and Limitations of Aboriginal and Torres Strait Islander Health Research: A Narrative Review of Intervention Studies
Source: MDPI journal article supplement (doi:10.3390/ijerph20053993), 2023-02-23
Supplement: s1 [file s1]

**Table S1.** Summary of the strengths and limitations reported in the studies (n = 240).

| Themes                                                                                | Evaluations<br><i>n</i> (%) | Implementations<br><i>n</i> (%) | Pilot<br>interventions<br><i>n</i> (%) | Trials<br><i>n</i> (%) |
|---------------------------------------------------------------------------------------|-----------------------------|---------------------------------|----------------------------------------|------------------------|
| <b>Strengths</b>                                                                      |                             |                                 |                                        |                        |
| Community engagement and partnerships<br>( <i>n</i> = 64)                             | 25 (22.73%)                 | 20 (45.45%)                     | 9 (30.00%)                             | 10 (17.86%)            |
| Sample qualities<br>( <i>n</i> = 32)                                                  | 11 (10.00%)                 | 4 (9.09%)                       | 4 (13.33%)                             | 13 (23.21%)            |
| Aboriginal and Torres Strait Islander Research Team<br>( <i>n</i> = 21)               | 8 (7.27%)                   | 5 (11.36%)                      | 5 (16.67%)                             | 3 (5.36%)              |
| Culturally appropriate and safe research practice<br>( <i>n</i> = 17)                 | 6 (5.45%)                   | 7 (15.91%)                      | 5 (16.67%)                             | 0 (0.00%)              |
| Capacity building efforts<br>( <i>n</i> = 12)                                         | 4 (3.64%)                   | 4 (9.09%)                       | 4 (13.33%)                             | 1 (1.79%)              |
| Providing resources or reducing costs for services and communities<br>( <i>n</i> = 9) | 3 (2.73%)                   | 5 (11.36%)                      | 1 (3.33%)                              | 0 (0.00%)              |
| Understanding local culture and context<br>( <i>n</i> = 7)                            | 4 (3.64%)                   | 1 (2.27%)                       | 2 (6.67%)                              | 0 (0.00%)              |
| Appropriate timelines for completion<br>( <i>n</i> = 2)                               | 1 (0.91%)                   | 1 (2.27%)                       | 0 (0.00%)                              | 0 (0.00%)              |
| <b>Limitations</b>                                                                    |                             |                                 |                                        |                        |
| Difficulties achieving the target sample size<br>( <i>n</i> = 119)                    | 46 (41.82%)                 | 18 (40.91%)                     | 22 (73.33%)                            | 33 (58.93%)            |
| Inadequate time to conduct research<br>( <i>n</i> = 23)                               | 10 (9/09%)                  | 5 (11.36%)                      | 6 (20.00%)                             | 2 (3.57%)              |
| Funding, costs, and resources<br>( <i>n</i> = 15)                                     | 8 (7.27%)                   | 2 (4.55%)                       | 4 (13.33%)                             | 1 (1.79%)              |
| Limited capacity of health workers and services<br>( <i>n</i> = 12)                   | 4 (3.64%)                   | 1 (2.27%)                       | 6 (20.00%)                             | 1 (1.79%)              |
| Lack of community involvement<br>( <i>n</i> = 3)                                      | 1 (0.91%)                   | 1 (2.27%)                       | 0 (0.00%)                              | 1 (1.79%)              |
| Communication issues between communities and researchers<br>( <i>n</i> = 3)           | 1 (0.91%)                   | 0 (0.00%)                       | 2 (6.67%)                              | 0 (0.00%)              |

Note. Evaluations (n =110), implementations (n = 44), pilot interventions (n = 30), and trials (n = 56). The cells represent the number and percentages of studies within the theme by publication classification.

**Table S2.** Detailed characteristics for each intervention article, 2008–2020.

| Study               | Publication classification | Journal                      | State         | Remoteness              | Barriers                                                                                                   | Enablers                                                                                                                                                                       |
|---------------------|----------------------------|------------------------------|---------------|-------------------------|------------------------------------------------------------------------------------------------------------|--------------------------------------------------------------------------------------------------------------------------------------------------------------------------------|
| Abbott 2013 [1]     | Implementation             | BMC Public Health            | NSW           | Urban                   |                                                                                                            |                                                                                                                                                                                |
| Adams 2012 [2]      | Evaluation                 | Health Soc Care Community    | VIC           | Urban                   |                                                                                                            |                                                                                                                                                                                |
| Andrews 2009 [3]    | Implementation             | PLoS Negl Trop Dis           | NT            | Remote                  |                                                                                                            | Community engagement and partnerships                                                                                                                                          |
| Anikeeva 2012 [4]   | Evaluation                 | Aust Fam Physician           | Other         | Not stated              |                                                                                                            |                                                                                                                                                                                |
| Anstey 2011 [5]     | Evaluation                 | Aust N Z J Public Health     | National      | National                |                                                                                                            | Community engagement and partnerships, Aboriginal and Torres Strait Islander research team                                                                                     |
| Armstrong 2020 [6]  | Implementation             | PLoS One                     | NSW, VIC, QLD | Rural, Remote, Urban    | Difficulties achieving the target sample size, inadequate time to conduct research                         |                                                                                                                                                                                |
| Arrow 2021 [7]*     | Trial                      | JDR Clin Trans Res           | WA            | Remote                  |                                                                                                            | Community engagement and partnerships, Aboriginal and Torres Strait Islander research team                                                                                     |
| Askew 2019 [8]      | Evaluation                 | BMC Public Health            | QLD           | Urban                   | Difficulties achieving the target sample size, inadequate time to conduct research, funding/cost/resources | Community engagement and partnerships, Aboriginal and Torres Strait Islander research team                                                                                     |
| Askew 2016 [9]      | Evaluation                 | BMC Health Serv Res          | QLD           | Urban                   |                                                                                                            |                                                                                                                                                                                |
| Atkinson 2014 [10]  | Evaluation                 | Aust J Prim Health           | NT            | Remote                  |                                                                                                            | Community engagement and partnerships                                                                                                                                          |
| Bailie 2015 [11]    | Evaluation                 | BMJ Open                     | National      | Regional, Rural, Remote |                                                                                                            | Community engagement and partnerships, sample qualities, providing resources or reducing costs for services and communities, culturally appropriate and safe research practice |
| Bailie 2011 [12]    | Evaluation                 | J Epidemiol Community Health | NT            | Remote                  |                                                                                                            |                                                                                                                                                                                |
| Barrett 2015 [13]   | Implementation             | Aust J Rural Health          | NSW           | Rural                   |                                                                                                            |                                                                                                                                                                                |
| Bar-Zeev 2019 [14]  | Pilot intervention         | BMJ Open                     | NSW, SA, QLD  | Regional, Urban         | Difficulties achieving the target sample size                                                              | Sample qualities                                                                                                                                                               |
| Battersby 2018 [15] | Implementation             | Aust J Rural Health          | National      | Not stated              |                                                                                                            | Community engagement and partnerships, Sample qualities                                                                                                                        |

|                        |                    |                          |                      |                         |                                                                                    |                                                                                  |
|------------------------|--------------------|--------------------------|----------------------|-------------------------|------------------------------------------------------------------------------------|----------------------------------------------------------------------------------|
| Bennett-Levy 2017 [16] | Implementation     | J Med Internet Res       | NSW                  | Urban                   |                                                                                    |                                                                                  |
| Berends 2018 [17]      | Evaluation         | Aust J Rural Health      | VIC                  | Not stated              |                                                                                    |                                                                                  |
| Bernardes 2018 [18]    | Pilot intervention | Eur J Cancer Care        | QLD                  | Not stated              | Difficulties achieving the target sample size                                      |                                                                                  |
| Bertilone 2015 [19]    | Implementation     | Med J Aust               | WA                   | Urban                   |                                                                                    |                                                                                  |
| Bierbaum 2017 [20]     | Evaluation         | Rural Remote Health      | SA                   | Regional, Urban         | Difficulties achieving the target sample size                                      | Culturally appropriate and safe research practice                                |
| Biggs 2016 [21]        | Evaluation         | Sex Health               | NSW                  | Urban                   |                                                                                    | Community engagement and partnerships                                            |
| Binks 2015 [22]        | Trial              | Vaccine                  | NT                   | Remote, Urban           | Difficulties achieving the target sample size                                      | Sample qualities                                                                 |
| Binks 2018 [23]        | Trial              | Pneumonia                | NT                   | Remote, Urban           | Difficulties achieving the target sample size                                      |                                                                                  |
| Bird 2016 [24]         | Evaluation         | Health Justice           | QLD                  | Regional, Rural, Remote |                                                                                    |                                                                                  |
| Black 2013a [25]       | Evaluation         | Med J Aust               | NSW                  | Not stated              |                                                                                    | Providing resources or reducing costs for services and communities               |
| Black 2013b [26]       | Evaluation         | Br J Nutr                | NSW                  | Not stated              |                                                                                    |                                                                                  |
| Black 2014 [27]        | Evaluation         | Aust N Z J Public Health | NSW                  | Not stated              |                                                                                    |                                                                                  |
| Blignault 2016 [28]    | Evaluation         | Aust N Z J Public Health | SA, WA, NT, QLD      | Regional, Remote        |                                                                                    | Community engagement and partnerships                                            |
| Borg 2018 [29]         | Trial              | Vaccine                  | VIC                  | Not stated              | Lack of community involvement                                                      |                                                                                  |
| Bowen 2016 [30]        | Trial              | Epidemiol Infect         | NT                   | Remote                  | Difficulties achieving the target sample size                                      |                                                                                  |
| Bowen 2014 [31]        | Trial              | BMC Infect Dis           | NT                   | Remote                  |                                                                                    | Sample qualities                                                                 |
| Boyle 2017 [32]        | Evaluation         | Aust J Rural Health      | QLD                  | Not stated              |                                                                                    |                                                                                  |
| Bradley 2020 [33]      | Implementation     | BMC Health Serv Res      | NSW, SA, WA, NT, ACT | Regional, Remote, Urban | Difficulties achieving the target sample size, inadequate time to conduct research | Community engagement and partnerships, sample qualities                          |
| Bradshaw 2015 [34]     | Implementation     | Aust J Rural Health      | WA                   | Not stated              |                                                                                    | Community engagement and partnerships, providing resources or reducing costs for |

|                         |                |                                 |          |            |                                                                                                                                     |                                                                                    |
|-------------------------|----------------|---------------------------------|----------|------------|-------------------------------------------------------------------------------------------------------------------------------------|------------------------------------------------------------------------------------|
|                         |                |                                 |          |            |                                                                                                                                     | services and communities, understanding local culture and context                  |
| Brimblecombe 2017a [35] | Evaluation     | SSM Popul Health                | NT, QLD  | Remote     | Funding/cost/resources, lack of community involvement                                                                               |                                                                                    |
| Brimblecombe 2018 [36]  | Trial          | Br J Nutr                       | NT       | Remote     | Difficulties achieving the target sample size, funding/cost/resources                                                               | Community engagement and partnerships, sample qualities, capacity building efforts |
| Brimblecombe 2017b [37] | Trial          | Lancet Public Health            | NT       | Remote     | Difficulties achieving the target sample size                                                                                       |                                                                                    |
| Brown 2019 [38]         | Evaluation     | Int J Environ Res Public Health | QLD      | Remote     | Difficulties achieving the target sample size, inadequate time to conduct research, limited capacity of health workers and services | Community engagement and partnerships                                              |
| Browne 2019a [39]       | Evaluation     | Public Health Nutr              | National | National   | Difficulties achieving the target sample size, inadequate time to conduct research                                                  |                                                                                    |
| Browne 2014 [40]        | Evaluation     | Aust J Prim Health              | VIC      | Not stated | Difficulties achieving the target sample size                                                                                       | Community engagement and partnerships, capacity building efforts                   |
| Browne 2019b [41]       | Evaluation     | Health Promot J Austr           | National | Not stated | Difficulties achieving the target sample size                                                                                       |                                                                                    |
| Burgess 2008 [42]       | Implementation | Aust Fam Physician              | NT       | Remote     | Difficulties achieving the target sample size                                                                                       |                                                                                    |
| Cameron 2014 [43]       | Implementation | Int J Audiol                    | NSW      | Urban      |                                                                                                                                     |                                                                                    |
| Campbell 2014 [44]      | Evaluation     | Aust J Prim Health              | NSW      | Not stated |                                                                                                                                     |                                                                                    |
| Campbell 2018 [45]      | Evaluation     | BMC Pregnancy Childbirth        | QLD      | Remote     | Difficulties achieving the target sample size, funding/cost/resources                                                               |                                                                                    |
| Canuto 2013 [46]        | Evaluation     | Int J Equity Health             | SA       | Urban      | Difficulties achieving the target sample size                                                                                       |                                                                                    |
| Canuto 2012 [47]        | Trial          | BMC Public Health               | SA       | Urban      | Difficulties achieving the target sample size                                                                                       |                                                                                    |
| Cargo 2011 [48]         | Evaluation     | BMC Public Health               | NT       | Remote     |                                                                                                                                     | Community engagement and partnerships                                              |
| Cartwright 2018 [49]    | Evaluation     | Int J Environ Res Public Health | QLD      | Not stated |                                                                                                                                     | Culturally appropriate and safe research practice                                  |
| Cashman 2016 [50]       | Evaluation     | BMC Public Health               | NSW      | Urban      |                                                                                                                                     |                                                                                    |
| Causser 2015 [51]       | Evaluation     | Sex Health                      | Other    | Remote     | Difficulties achieving the target sample size                                                                                       |                                                                                    |
| Hulme 2018 [52]         | Evaluation     | Rural Remote Health             | VIC      | Regional   |                                                                                                                                     |                                                                                    |

|                         |                    |                          |       |               |                                                                                                             |                                                                                                                         |
|-------------------------|--------------------|--------------------------|-------|---------------|-------------------------------------------------------------------------------------------------------------|-------------------------------------------------------------------------------------------------------------------------|
| Chenhall 2008 [53]      | Evaluation         | Anthropol Med            | Other | Rural         |                                                                                                             |                                                                                                                         |
| Christou 2013 [54]      | Evaluation         | Contemp Nurse            | WA    | Not stated    | Difficulties achieving the target sample size, limited capacity of health workers and services              |                                                                                                                         |
| Ciccone 2019 [55]       | Pilot intervention | Int J Speech Lang Pathol | WA    | Not stated    | Difficulties achieving the target sample size, limited capacity of health workers and services              | Capacity building efforts, culturally appropriate and safe research practice                                            |
| Clapham 2018 [56]       | Evaluation         | Health Promot J Austr    | NSW   | Urban         | Limited capacity of health workers and services                                                             |                                                                                                                         |
| Clark 2015 [57]         | Pilot intervention | Rural Remote Health      | QLD   | Not stated    | Difficulties achieving the target sample size                                                               | Aboriginal and Torres Strait Islander research team, capacity building efforts, understanding local culture and context |
| Clifford 2011 [58]      | Implementation     | Drug Alcohol Rev         | Other | Rural, Urban  | Difficulties achieving the target sample size                                                               | Community engagement and partnerships                                                                                   |
| Clifford 2013 [59]      | Implementation     | Drug Alcohol Rev         | NSW   | Rural, Urban  | Difficulties achieving the target sample size, inadequate time to conduct research                          |                                                                                                                         |
| Coffin 2019 [60]        | Implementation     | Front Public Health      | WA    | Not stated    | Inadequate time to conduct research                                                                         | Aboriginal and Torres Strait Islander research team, sample qualities                                                   |
| Conigrave 2012 [61]     | Pilot intervention | Health Promot J Austr    | NSW   | Urban         | Difficulties achieving the target sample size, inadequate time to conduct research, funding/costs/resources | Community engagement and partnerships                                                                                   |
| Cooper 2012 [62]        | Pilot intervention | J Paediatr Child Health  | NT    | Remote        | Difficulties achieving the target sample size                                                               |                                                                                                                         |
| Cresp 2016 [63]         | Evaluation         | Med J Aust               | WA    | Remote, Urban | Difficulties achieving the target sample size                                                               |                                                                                                                         |
| Crouch 2011 [64]        | Implementation     | Australas Psychiatry     | QLD   | Remote        | Funding/costs/resources                                                                                     | Community engagement and partnerships                                                                                   |
| Cuesta-Briand 2015 [65] | Evaluation         | Int J Equity Health      | Other | Not stated    |                                                                                                             |                                                                                                                         |
| d'Abbs 2008 [66]        | Evaluation         | Aust J Rural Health      | QLD   | Remote        |                                                                                                             |                                                                                                                         |
| Davey 2014 [67]         | Evaluation         | BMC Health Serv Res      | TAS   | Urban         | Difficulties achieving the target sample size                                                               |                                                                                                                         |
| Davies 2020 [68]        | Implementation     | Aust J Rural Health      | NSW   | Rural         | Difficulties achieving the target sample size                                                               | Culturally appropriate and safe research practice                                                                       |
| Daws 2014 [69]          | Implementation     | Aust Health Rev          | VIC   | Urban         | Difficulties achieving the target sample size                                                               | Community engagement and partnerships, providing resources or reducing costs for services and communities               |

|                         |                    |                          |            |                         |                                               |                                                                                                                                                                                            |
|-------------------------|--------------------|--------------------------|------------|-------------------------|-----------------------------------------------|--------------------------------------------------------------------------------------------------------------------------------------------------------------------------------------------|
| DiGiacomo 2010 [70]     | Evaluation         | Qual Prim Care           | Other      | Not stated              |                                               | Community engagement and partnerships, culturally appropriate and safe research practice                                                                                                   |
| Dimer 2013 [71]         | Implementation     | Aust Health Rev          | WA         | Not stated              |                                               | Community engagement and partnerships, culturally appropriate and safe research practice                                                                                                   |
| Dimitropoulos 2019 [72] | Implementation     | Health Promot J Austr    | NSW        | Rural                   | Difficulties achieving the target sample size | Community engagement and partnerships                                                                                                                                                      |
| Dimitropoulos 2020 [73] | Implementation     | Community Dent Health    | NSW        | Rural, Remote           | Difficulties achieving the target sample size | Community engagement and partnerships, sample qualities, Aboriginal and Torres Strait Islander research team, culturally appropriate and safe research practice, capacity building efforts |
| Dingwall 2017 [74]      | Pilot intervention | BMC Psychol              | SA, WA, NT | Remote                  | Difficulties achieving the target sample size |                                                                                                                                                                                            |
| Divaris 2013 [75]       | Trial              | Caries Res               | NT         | Not stated              |                                               |                                                                                                                                                                                            |
| Dorrington 2015 [76]    | Evaluation         | Aust J Prim Health       | ACT        | Urban                   | Inadequate time to conduct research           | Community engagement and partnerships                                                                                                                                                      |
| Doyle 2016 [77]         | Evaluation         | BMC Health Serv Res      | VIC        | Not stated              | Difficulties achieving the target sample size | Community engagement and partnerships, understanding local culture and context                                                                                                             |
| Duley 2017 [78]         | Evaluation         | Health Promot J Austr    | NSW        | Regional, Remote, Urban | Difficulties achieving the target sample size | Community engagement and partnerships, culturally appropriate and safe research practice                                                                                                   |
| Durey 2017 [79]         | Evaluation         | BMC Health Serv Res      | WA         | Not stated              | Difficulties achieving the target sample size |                                                                                                                                                                                            |
| Eades 2012 [80]         | Trial              | Med J Aust               | QLD        | Urban                   | Difficulties achieving the target sample size |                                                                                                                                                                                            |
| Edmunds 2016 [81]       | Evaluation         | BMC Pregnancy Childbirth | QLD        | Remote                  |                                               |                                                                                                                                                                                            |
| Eley 2010a [82]         | Evaluation         | J Rural Health           | QLD        | Not stated              | Funding/costs/resources                       |                                                                                                                                                                                            |
| Eley 2010b [83]         | Evaluation         | Health Promot J Austr    | QLD        | Rural                   |                                               | Community engagement and partnerships, sample qualities                                                                                                                                    |
| Elliott 2010 [84]       | Pilot intervention | Telemed J E Health       | QLD        | Remote                  |                                               | Community engagement and partnerships, Aboriginal and Torres Strait Islander research team, culturally appropriate and safe research practice                                              |
| Farnbach 2019 [85]      | Evaluation         | BMC Public Health        | National   | National                |                                               |                                                                                                                                                                                            |

|                       |                    |                                 |              |                      |                                                                                    |                                                                                                                       |
|-----------------------|--------------------|---------------------------------|--------------|----------------------|------------------------------------------------------------------------------------|-----------------------------------------------------------------------------------------------------------------------|
| Ferson 2019 [86]      | Pilot intervention | Commun Dis Intell               | NSW          | Urban                |                                                                                    |                                                                                                                       |
| Fletcher 2015 [87]    | Implementation     | Int J Lang Commun Disord        | NT           | Remote               | Difficulties achieving the target sample size                                      | Culturally appropriate and safe research practice                                                                     |
| Genat 2016 [88]       | Evaluation         | Contemp Nurse                   | VIC          | Other                |                                                                                    | Community engagement and partnerships, Aboriginal and Torres Strait Islander research team, capacity building efforts |
| Gibson-Helm 2018 [89] | Evaluation         | PLoS One                        | National     | Rural, Remote, Urban |                                                                                    | Sample qualities                                                                                                      |
| Gordon 2012 [90]      | Evaluation         | N S W Public Health Bull        | NSW          | Not stated           |                                                                                    |                                                                                                                       |
| Gould 2017 [91]       | Implementation     | Implement Sci                   | National     | Other                |                                                                                    |                                                                                                                       |
| Gould 2019 [92]       | Pilot intervention | Addict Behav                    | NSW, SA, QLD | Other                | Difficulties achieving the target sample size, inadequate time to conduct research | Sample qualities, understanding local culture and context                                                             |
| Govil 2014 [93]       | Evaluation         | Aust J Prim Health              | WA           | Regional             | Difficulties achieving the target sample size                                      |                                                                                                                       |
| Graham 2015 [94]      | Evaluation         | BMC Infect Dis                  | NSW          | Not stated           |                                                                                    | Sample qualities                                                                                                      |
| Guy 2018 [95]         | Trial              | Lancet Infect Dis               | SA, WA, QLD  | Rural, Remote        |                                                                                    | Sample qualities                                                                                                      |
| Guy 2015 [96]         | Trial              | Sex Transm Infect               | NT           | Remote               | Difficulties achieving the target sample size                                      | Sample qualities                                                                                                      |
| Haag 2019 [97]        | Trial              | Nutrients                       | SA           | Not stated           | Difficulties achieving the target sample size                                      |                                                                                                                       |
| Haigh 2016 [98]       | Evaluation         | Aust N Z J Public Health        | WA, QLD      | Not stated           | Difficulties achieving the target sample size                                      |                                                                                                                       |
| Harch 2012 [99]       | Evaluation         | Aust Fam Physician              | WA           | Remote               |                                                                                    | Providing resources or reducing costs for services and communities                                                    |
| Hare 2015 [100]       | Trial              | Eur J Clin Microbiol Infect Dis | NT           | Remote               | Difficulties achieving the target sample size                                      |                                                                                                                       |
| Haynes 2019 [101]     | Evaluation         | Eval Program Plann              | NT           | Remote               |                                                                                    | Community engagement and partnerships                                                                                 |
| Hearn 2011 [102]      | Evaluation         | Health Promot J Austr           | NSW          | Not stated           | Difficulties achieving the target sample size                                      |                                                                                                                       |
| Hickey 2019 [103]     | Evaluation         | Eval Program Plann              | National     | Urban                |                                                                                    | Community engagement and partnerships                                                                                 |

|                           |                    |                                       |          |                      |                                                                                                |                                                                                            |
|---------------------------|--------------------|---------------------------------------|----------|----------------------|------------------------------------------------------------------------------------------------|--------------------------------------------------------------------------------------------|
| Hogg 2017 [104]           | Evaluation         | JBH Database System Rev Implement Rep | QLD      | Urban                | Difficulties achieving the target sample size, inadequate time to conduct research             | Community engagement and partnerships, Aboriginal and Torres Strait Islander research team |
| Hotu 2018 [105]           | Evaluation         | Aust J Rural Health                   | National | Remote               | Difficulties achieving the target sample size                                                  |                                                                                            |
| Hoy 2019 [106]            | Trial              | Contemp Clin Trials Commun            | NT       | Remote               | Difficulties achieving the target sample size, inadequate time to conduct research             |                                                                                            |
| Hu 2019a [107]            | Implementation     | Public Health                         | QLD      | Regional, Urban      |                                                                                                |                                                                                            |
| Hu 2019b [108]            | Implementation     | Aust J Prim Health                    | QLD      | Urban                | Difficulties achieving the target sample size                                                  | Community engagement and partnerships, culturally appropriate and safe research practice   |
| Hume 2014 [109]           | Pilot intervention | Aust N Z J Public Health              | NT       | Remote               | Difficulties achieving the target sample size                                                  | Providing resources or reducing costs for services and communities                         |
| Isaacs 2014 [110]         | Implementation     | Australas Psychiatry                  | VIC      | Rural, Remote        | Difficulties achieving the target sample size, limited capacity of health workers and services | Community engagement and partnerships                                                      |
| Ivers 2019 [111]          | Evaluation         | Aust J Rural Health                   | NSW      | Not stated           | Difficulties achieving the target sample size                                                  |                                                                                            |
| Jacups 2018 [112]         | Evaluation         | J Eval Clin Pract                     | QLD      | Remote               |                                                                                                |                                                                                            |
| Jainullabudeen 2015 [113] | Implementation     | BMC Public Health                     | QLD      | Not stated           |                                                                                                | Community engagement and partnerships                                                      |
| Jamieson 2016 [114]       | Trial              | J Health Care Poor Underserved        | SA       | Not stated           |                                                                                                |                                                                                            |
| Jamieson 2020 [115]       | Implementation     | BMC Res Notes                         | NT       | Remote               | Difficulties achieving the target sample size, lack of community involvement                   |                                                                                            |
| Jamieson 2019a [116]      | Trial              | JAMA Netw Open                        | SA       | Other                |                                                                                                | Sample qualities                                                                           |
| Jamieson 2019b [117]      | Trial              | JAMA Netw Open                        | SA       | Other                | Difficulties achieving the target sample size                                                  |                                                                                            |
| Jamieson 2018 [118]       | Trial              | EClinicalMedicine                     | SA       | Regional, Urban      |                                                                                                | Community engagement and partnerships                                                      |
| Janca 2015 [119]          | Evaluation         | Australas Psychiatry                  | WA, NT   | Rural, Remote, Urban | Difficulties achieving the target sample size                                                  |                                                                                            |
| Janca 2017 [120]          | Evaluation         | Australas Psychiatry                  | National | National             | Difficulties achieving the target sample size                                                  |                                                                                            |
| Johnson 2015 [121]        | Trial              | BMC Public Health                     | QLD      | Remote               | Difficulties achieving the target sample size                                                  |                                                                                            |



|                         |                    |                                 |          |                        |                                                                                                |                                                                                                           |
|-------------------------|--------------------|---------------------------------|----------|------------------------|------------------------------------------------------------------------------------------------|-----------------------------------------------------------------------------------------------------------|
| Ju 2017 [122]           | Trial              | Community Dent Oral Epidemiol   | SA       | Regional               | Difficulties achieving the target sample size                                                  | Community engagement and partnerships                                                                     |
| Kanagasingam 2015 [123] | Implementation     | Conf Proc IEEE Eng Med Biol Soc | WA, QLD  | Rural, Remote          |                                                                                                |                                                                                                           |
| Kapellas 2013 [124]     | Trial              | J Clin Periodontol              | NT       | Other                  | Difficulties achieving the target sample size                                                  | Community engagement and partnerships, sample qualities                                                   |
| Kapellas 2014 [125]     | Trial              | Hypertension                    | NT       | Other                  | Difficulties achieving the target sample size                                                  |                                                                                                           |
| Kapellas 2017 [126]     | Trial              | Int J Dent Hyg                  | NT       | Regional, Urban        |                                                                                                |                                                                                                           |
| Khalil 2019 [127]       | Implementation     | Aust J Rural Health             | Other    | Rural                  | Difficulties achieving the target sample size                                                  | Community engagement and partnerships, providing resources or reducing costs for services and communities |
| Kiran 2010 [128]        | Trial              | Health Promot J Austr           | QLD      | Not stated             |                                                                                                |                                                                                                           |
| Kirkham 2019 [129]      | Pilot intervention | Aust N Z J Obstet Gynaecol      | NT       | Remote                 | Difficulties achieving the target sample size, limited capacity of health workers and services |                                                                                                           |
| Lange 2014 [130]        | Implementation     | Aust J Prim Health              | NT       | Remote                 |                                                                                                |                                                                                                           |
| Lange 2017 [131]        | Evaluation         | PLoS Negl Trop Dis              | NT       | Remote                 | Difficulties achieving the target sample size, funding/costs/resources                         | Sample qualities                                                                                          |
| Leach 2008a [132]       | Trial              | BMC Pediatr                     | NT       | Not stated             |                                                                                                |                                                                                                           |
| Leach 2008b [133]       | Trial              | Pediatr Infect Dis J            | Other    | Remote                 |                                                                                                |                                                                                                           |
| Lee 2016 [134]          | Pilot intervention | Public Health Res Pract         | NSW      | Regional, Rural, Urban |                                                                                                |                                                                                                           |
| Lee 2008 [135]          | Evaluation         | Drug Alcohol Rev                | NT       | Remote                 |                                                                                                | Community engagement and partnerships                                                                     |
| Liaw 2015 [136]         | Pilot intervention | Aust Fam Physician              | NSW      | Not stated             | Difficulties achieving the target sample size                                                  |                                                                                                           |
| Liaw 2019 [137]         | Trial              | Med J Aust                      | NSW, VIC | Urban                  | Difficulties achieving the target sample size, inadequate time to conduct research             |                                                                                                           |
| Liberato 2016 [138]     | Pilot intervention | Aust N Z J Public Health        | NT       | Remote                 | Difficulties achieving the target sample size                                                  |                                                                                                           |
| Lin 2016 [139]          | Pilot intervention | BMC Fam Pract                   | WA       | Rural                  | Difficulties achieving the target sample size                                                  |                                                                                                           |

|                       |                    |                            |                 |                        |                                                                                                                                  |                                                                                                                                                                |
|-----------------------|--------------------|----------------------------|-----------------|------------------------|----------------------------------------------------------------------------------------------------------------------------------|----------------------------------------------------------------------------------------------------------------------------------------------------------------|
| Lobo 2020 [140]       | Evaluation         | Sex Health                 |                 | Remote                 |                                                                                                                                  | Community engagement and partnerships, Aboriginal and Torres Strait Islander research team, capacity building efforts                                          |
| LoGiudice 2012 [141]  | Implementation     | Rural Remote Health        | WA              | Remote                 | Funding/costs/resources                                                                                                          | Community engagement and partnerships, Aboriginal and Torres Strait Islander research team, providing resources or reducing costs for services and communities |
| Lovie-Toon 2018 [142] | Evaluation         | Front Pediatr              | QLD             | Urban                  | Difficulties achieving the target sample size                                                                                    | Appropriate timelines for completion                                                                                                                           |
| Lowell 2015 [143]     | Evaluation         | BMC Pregnancy Childbirth   | NT              | Remote                 | Difficulties achieving the target sample size, funding/costs/resources, communication issues between communities and researchers | Community engagement and partnerships, Aboriginal and Torres Strait Islander research team                                                                     |
| Lukaszyk 2018 [144]   | Pilot intervention | Health Promot J Austr      | NSW             | Not stated             | Inadequate time to conduct research                                                                                              | Community engagement and partnerships                                                                                                                          |
| MacDonald 2016 [145]  | Pilot intervention | Aust J Prim Health         | VIC             | Regional, Rural, Urban | Difficulties achieving the target sample size, limited capacity of health workers and services                                   | Community engagement and partnerships                                                                                                                          |
| Macniven 2019 [146]   | Pilot intervention | Aust N Z J Public Health   | NSW, WA, NT     | Rural, Remote, Urban   | Inadequate time to conduct research, limited capacity of health workers and services                                             | Community engagement and partnerships, sample qualities                                                                                                        |
| Magnus 2018 [147]     | Evaluation         | PLoS One                   | NT              | Remote                 |                                                                                                                                  |                                                                                                                                                                |
| Maksimovic 2015 [148] | Evaluation         | Health Promot J Austr      | SA              | Other                  | Difficulties achieving the target sample size, inadequate time to conduct research, funding/costs/resources                      | Community engagement and partnerships, sample qualities                                                                                                        |
| Malseed 2014 [149]    | Evaluation         | Aust J Prim Health         | QLD             | Urban                  | Difficulties achieving the target sample size, inadequate time to conduct research                                               | Sample qualities                                                                                                                                               |
| Manifold 2019 [150]   | Pilot intervention | Aust J Prim Health         | WA              | Remote                 | Difficulties achieving the target sample size                                                                                    |                                                                                                                                                                |
| Marley 2014 [151]     | Trial              | BMC Public Health          | WA              | Remote                 | Difficulties achieving the target sample size                                                                                    |                                                                                                                                                                |
| Martin 2019 [152]     | Pilot intervention | Aust N Z J Public Health   | National        | Not stated             | Difficulties achieving the target sample size, funding/costs/resources, communication issues between communities and researchers | Culturally appropriate and safe research practice                                                                                                              |
| McCallum 2015 [153]   | Trial              | Front Pediatr              | NT              | Not stated             |                                                                                                                                  | Sample qualities                                                                                                                                               |
| McDonald 2015 [154]   | Evaluation         | BMC Public Health          | NSW, SA, WA, NT | Remote                 | Inadequate time to conduct research                                                                                              |                                                                                                                                                                |
| McHugh 2019 [155]     | Trial              | Aust N Z J Obstet Gynaecol | NT              | Remote, Urban          |                                                                                                                                  | Sample qualities                                                                                                                                               |

|                       |                    |                          |        |                         |                                                                                                                                                                                   |                                                                                            |
|-----------------------|--------------------|--------------------------|--------|-------------------------|-----------------------------------------------------------------------------------------------------------------------------------------------------------------------------------|--------------------------------------------------------------------------------------------|
| McKay 2015 [156]      | Evaluation         | Health Promot J Austr    | NT     | Not stated              | Difficulties achieving the target sample size                                                                                                                                     |                                                                                            |
| McMahon 2017 [157]    | Implementation     | Nutrients                | WA, NT | Rural, Remote           | Difficulties achieving the target sample size                                                                                                                                     |                                                                                            |
| McRae 2008 [158]      | Evaluation         | Rural Remote Health      | NSW    | Regional                | Limited capacity of health workers and services                                                                                                                                   | Community engagement and partnerships                                                      |
| Medlin 2014 [159]     | Pilot intervention | Aust Health Rev          | QLD    | Rural, Remote           | Difficulties achieving the target sample size, funding/costs/resources, limited capacity of health workers and services, communication issues between communities and researchers | Community engagement and partnerships, Aboriginal and Torres Strait Islander research team |
| Meihubers 2013 [160]  | Implementation     | N S W Public Health Bull | NSW    | Regional                |                                                                                                                                                                                   | Community engagement and partnerships, capacity building efforts                           |
| Mendham 2012 [161]    | Pilot intervention | Eur J Appl Physiol       |        | Regional                |                                                                                                                                                                                   |                                                                                            |
| Mendham 2014 [162]    | Pilot intervention | Am J Hum Biol            |        | Regional                |                                                                                                                                                                                   |                                                                                            |
| Mendham 2015 [163]    | Trial              | J Sci Med Sport          | NSW    | Regional                |                                                                                                                                                                                   | Community engagement and partnerships                                                      |
| Meyer 2016 [164]      | Evaluation         | Health Promot J Austr    | WA     | Regional, Remote, Urban | Difficulties achieving the target sample size                                                                                                                                     |                                                                                            |
| Mills 2017 [165]      | Evaluation         | BMC Health Serv Res      | QLD    | Not stated              | Difficulties achieving the target sample size                                                                                                                                     |                                                                                            |
| Morris 2010 [166]     | Trial              | Med J Aust               | NT     | Rural, Remote           | Difficulties achieving the target sample size                                                                                                                                     |                                                                                            |
| Munro 2017 [167]      | Evaluation         | Aust J Rural Health      | NSW    | Remote                  |                                                                                                                                                                                   | Understanding local culture and context                                                    |
| Nagel 2009 [168]      | Trial              | Aust J Rural Health      | NT     | Remote                  | Difficulties achieving the target sample size                                                                                                                                     |                                                                                            |
| Nguyen 2018 [169]     | Pilot intervention | Prev Sci                 | NT     | Remote                  |                                                                                                                                                                                   | Community engagement and partnerships, sample qualities, capacity building efforts         |
| Nguyen 2015 [170]     | Evaluation         | PLoS One                 | QLD    | Not stated              |                                                                                                                                                                                   |                                                                                            |
| Noble 2015 [171]      | Trial              | BMC Fam Pract            | NSW    | Regional                | Difficulties achieving the target sample size                                                                                                                                     |                                                                                            |
| O'Donoghue 2014 [172] | Evaluation         | Aust J Prim Health       | NT     | Not stated              |                                                                                                                                                                                   | Sample qualities                                                                           |
| O'Grady 2015 [173]    | Pilot intervention | BMC Res Notes            | QLD    | Not stated              | Difficulties achieving the target sample size                                                                                                                                     | Culturally appropriate and safe research practice, capacity building efforts,              |

|                           |                    |                                 |          |                        |                                                              |                                                                                                                     |
|---------------------------|--------------------|---------------------------------|----------|------------------------|--------------------------------------------------------------|---------------------------------------------------------------------------------------------------------------------|
|                           |                    |                                 |          |                        |                                                              | Aboriginal and Torres Strait Islander research team                                                                 |
| O'Grady 2012 [174]        | Trial              | Pediatr Pulmonol                | NT       | Remote                 |                                                              |                                                                                                                     |
| O'Halloran 2018 [175]     | Evaluation         | Clin Exp Ophthalmol             | WA       | Remote, Urban          | Difficulties achieving the target sample size                |                                                                                                                     |
| Ong 2014 [176]            | Evaluation         | Heart Lung Circ                 | National | National               |                                                              | Understanding local culture and context                                                                             |
| Panaretto 2013 [177]      | Evaluation         | BMJ Open                        | QLD      | Not stated             |                                                              |                                                                                                                     |
| Passmore 2017 [178]       | Evaluation         | BMC Public Health               | NSW      | Other                  | Difficulties achieving the target sample size                | Understanding local culture and context, Aboriginal and Torres Strait Islander research team                        |
| Payne 2013 [179]          | Evaluation         | Contemp Nurse                   | QLD      | Not stated             |                                                              |                                                                                                                     |
| Peiris 2019a [180]        | Evaluation         | JMIR Mhealth Uhealth            | NSW      | Not stated             | Difficulties achieving the target sample size                |                                                                                                                     |
| Peiris 2019b [181]        | Trial              | JMIR Mhealth Uhealth            | NSW      | Not stated             | Difficulties achieving the target sample size                |                                                                                                                     |
| Pettigrew 2015 [182]      | Evaluation         | Soc Sci Med                     | WA       | Regional, Urban        |                                                              |                                                                                                                     |
| Phillips 2014 [183]       | Trial              | J Paediatr Child Health         | NT       | Remote                 | Difficulties achieving the target sample size                | Community engagement and partnerships                                                                               |
| Poder 2019 [184]          | Evaluation         | Health Promot J Austr           | NSW      | Not stated             | Difficulties achieving the target sample size                | Sample qualities, culturally appropriate and safe research practice                                                 |
| Prowse 2014 [185]         | Trial              | Int J Ment Health Syst          | NT       | Remote                 | Difficulties achieving the target sample size                |                                                                                                                     |
| Quilty 2019 [186]         | Pilot intervention | Int J Environ Res Public Health | NT       | Rural, Remote          | Inadequate time to conduct research, funding/costs/resources |                                                                                                                     |
| Quinn 2017 [187]          | Evaluation         | Int J Equity Health             | NSW      | Not stated             | Difficulties achieving the target sample size                |                                                                                                                     |
| Raphiphatthana 2020 [188] | Implementation     | BMC Health Serv Res             | SA, NT   | Remote                 | Difficulties achieving the target sample size                | Community engagement and partnerships                                                                               |
| Read 2018 [189]           | Evaluation         | J Am Heart Assoc                | NT       | Not stated             | Difficulties achieving the target sample size                |                                                                                                                     |
| Reath 2008 [190]          | Implementation     | Aust Fam Physician              | Other    | Regional, Rural, Urban |                                                              | Community engagement and partnerships, culturally appropriate and safe research practice, capacity building efforts |

|                            |                    |                                 |          |                 |                                                                                                |                                                                                                                                               |
|----------------------------|--------------------|---------------------------------|----------|-----------------|------------------------------------------------------------------------------------------------|-----------------------------------------------------------------------------------------------------------------------------------------------|
| Reeve 2016 [191]           | Evaluation         | Aust J Rural Health             | WA       | Remote          |                                                                                                |                                                                                                                                               |
| Reeve 2015 [192]           | Evaluation         | Med J Aust                      | WA       | Remote          |                                                                                                |                                                                                                                                               |
| Reeve 2014 [193]           | Evaluation         | Aust J Rural Health             | WA       | Remote          |                                                                                                |                                                                                                                                               |
| Reilly 2011 [194]          | Pilot intervention | BMC Public Health               | VIC      | Regional, Urban | Difficulties achieving the target sample size, inadequate time to conduct research             |                                                                                                                                               |
| Ritchie 2010 [195]         | Trial              | J Pediatr Gastroenterol Nutr    | NT       | Rural, Remote   | Difficulties achieving the target sample size                                                  |                                                                                                                                               |
| Roberts 2017 [196]         | Evaluation         | J Am Heart Assoc                | NT       | Other           |                                                                                                |                                                                                                                                               |
| Robertson 2013 [197]       | Implementation     | Int J Environ Res Public Health | NT       | Remote          |                                                                                                | Community engagement and partnerships, Appropriate timelines for completion                                                                   |
| Roberts-Thomson 2019 [198] | Pilot intervention | Aust Dent J                     | Other    | Remote          | Difficulties achieving the target sample size                                                  |                                                                                                                                               |
| Roberts-Thomson 2010 [199] | Trial              | Int Dent J                      | NT       | Remote          |                                                                                                | Community engagement and partnerships, Aboriginal and Torres Strait Islander research team                                                    |
| Robinson 2020 [200]        | Pilot intervention | Front Public Health             | NT       | Remote          | Difficulties achieving the target sample size                                                  |                                                                                                                                               |
| Schmidt 2016 [201]         | Evaluation         | Aust N Z J Public Health        | QLD      | Remote          | Difficulties achieving the target sample size                                                  | Sample qualities, capacity building efforts                                                                                                   |
| Schultz 2012 [202]         | Implementation     | Rural Remote Health             | NT       | Remote          |                                                                                                |                                                                                                                                               |
| Seear 2020 [203]           | Implementation     | Eval Program Plann              | WA       | Remote          | Difficulties achieving the target sample size, limited capacity of health workers and services | Community engagement and partnerships, Aboriginal and Torres Strait Islander research team, culturally appropriate and safe research practice |
| Segal 2016 [204]           | Trial              | Med J Aust                      | QLD      | Rural, Remote   | Difficulties achieving the target sample size                                                  |                                                                                                                                               |
| Shephard 2016 [205]        | Evaluation         | Aust J Prim Health              | National | Other           | Difficulties achieving the target sample size, funding/costs/resources                         |                                                                                                                                               |
| Shephard 2017 [206]        | Evaluation         | Clin Biochem                    | National | Other           |                                                                                                |                                                                                                                                               |
| Shield 2018 [207]          | Implementation     | Trop Med Infect Dis             | NT       | Remote          |                                                                                                | Community engagement and partnerships                                                                                                         |
| Sinclair 2016 [208]        | Evaluation         | Aust N Z J Public Health        | WA       | Remote          |                                                                                                |                                                                                                                                               |

|                      |                |                                 |              |                      |                                                                                                |                                                                                               |
|----------------------|----------------|---------------------------------|--------------|----------------------|------------------------------------------------------------------------------------------------|-----------------------------------------------------------------------------------------------|
| Slade 2011 [209]     | Trial          | Community Dent Oral Epidemiol   | NT           | Remote               | Difficulties achieving the target sample size, limited capacity of health workers and services |                                                                                               |
| Smith 2013 [210]     | Implementation | J Telemed Telecare              | QLD          | Remote               |                                                                                                | Community engagement and partnerships, Aboriginal and Torres Strait Islander research team    |
| Smith 2012 [211]     | Implementation | J Telemed Telecare              | QLD          | Remote               |                                                                                                | Aboriginal and Torres Strait Islander research team                                           |
| Smith 2015 [212]     | Evaluation     | J Telemed Telecare              | QLD          | Not stated           | Inadequate time to conduct research                                                            | Community engagement and partnerships, Aboriginal and Torres Strait Islander research team    |
| Smith 2018 [213]     | Implementation | Community Dent Health           | NSW          | Rural, Remote, Urban | Difficulties achieving the target sample size, inadequate time to conduct research             | Providing resources or reducing costs for services and communities, capacity building efforts |
| Smithers 2017 [214]  | Trial          | Br J Nutr                       | SA           | Rural, Remote        |                                                                                                | Community engagement and partnerships, Aboriginal and Torres Strait Islander research team    |
| Snodgrass 2020 [215] | Implementation | Aust J Rural Health             | NSW, WA, QLD | Regional, Rural      | Difficulties achieving the target sample size                                                  |                                                                                               |
| Soares 2020 [216]    | Trial          | Int J Paediatr Dent             | SA           | Rural, Urban         | Difficulties achieving the target sample size                                                  |                                                                                               |
| Spaeth 2014 [217]    | Implementation | Rural Remote Health             | NT           | Remote               |                                                                                                |                                                                                               |
| Spurling 2013 [218]  | Evaluation     | BMC Med Inform Decis Mak        | QLD          | Urban                | Difficulties achieving the target sample size                                                  |                                                                                               |
| Spurling 2009 [219]  | Evaluation     | Med J Aust                      | QLD          | Urban                | Difficulties achieving the target sample size                                                  | Sample qualities                                                                              |
| Standen 2020 [220]   | Evaluation     | Int J Environ Res Public Health | NSW          | Not stated           |                                                                                                |                                                                                               |
| Stanley 2019 [221]   | Evaluation     | Australas Psychiatry            | WA           | Not stated           | Difficulties achieving the target sample size                                                  |                                                                                               |
| Stephen 2013 [222]   | Trial          | Med J Aust                      | NT           | Remote               | Difficulties achieving the target sample size                                                  | Sample qualities                                                                              |
| Sun 2016 [223]       | Trial          | Am J Health Promot              | QLD          | Not stated           | Difficulties achieving the target sample size                                                  |                                                                                               |
| Tan 2015 [224]       | Trial          | J Paediatr Child Health         | WA           | Rural, Urban         | Difficulties achieving the target sample size                                                  |                                                                                               |
| Tane 2018 [225]      | Evaluation     | Health Promot J Austr           | NT           | Remote               | Difficulties achieving the target sample size                                                  | Community engagement and partnerships                                                         |

|                      |            |                                 |             |            |                                               |                                                         |
|----------------------|------------|---------------------------------|-------------|------------|-----------------------------------------------|---------------------------------------------------------|
| Thomas 2020 [226]    | Evaluation | Tob Control                     | SA, WA, NT  | Remote     |                                               |                                                         |
| Thomas 2010 [227]    | Evaluation | Aust N Z J Public Health        | NT          | Remote     | Difficulties achieving the target sample size |                                                         |
| Thomas 2008 [228]    | Evaluation | N S W Public Health Bull        | NSW         | Urban      |                                               |                                                         |
| Thornton 2017a [229] | Trial      | Int J Pediatr Otorhinolaryngol  | WA          | Not stated |                                               |                                                         |
| Thornton 2017b [230] | Trial      | Clin Vaccine Immunol            | WA          | Not stated |                                               |                                                         |
| Tighe 2017 [231]     | Trial      | BMJ Open                        | WA          | Remote     | Difficulties achieving the target sample size | Community engagement and partnerships, sample qualities |
| Tong 2010 [232]      | Trial      | J Paediatr Child Health         | NT          | Remote     |                                               |                                                         |
| Treloar 2018 [233]   | Evaluation | Harm Reduct J                   | NSW         | Urban      | Difficulties achieving the target sample size |                                                         |
| Valery 2010 [234]    | Trial      | Med J Aust                      | QLD         | Remote     | Difficulties achieving the target sample size | Sample qualities                                        |
| Vallesi 2018 [235]   | Evaluation | Int J Environ Res Public Health | WA          | Not stated |                                               |                                                         |
| Ward 2016 [236]      | Trial      | Med J Aust                      | WA, NT, QLD | Remote     |                                               | Sample qualities                                        |
| Ward 2019 [237]      | Trial      | Lancet Glob Health              | WA, NT, QLD | Remote     |                                               |                                                         |
| Whiteside 2012 [238] | Evaluation | Health Promot J Austr           | QLD         | Remote     |                                               |                                                         |
| Xu 2018 [239]        | Evaluation | Aust J Prim Health              | VIC         | Not stated | Difficulties achieving the target sample size |                                                         |
| Young 2016 [240]     | Evaluation | Aust N Z J Public Health        | NSW         | Urban      | Inadequate time to conduct research           |                                                         |

*Note. NSW = New South Wales, QLD = Queensland, VIC = Victoria, NT = Northern Territory, SA = South Australia, WA = Western Australia, ACT = Australian National Territory, TAS = Tasmania.*

*\* The articles included in the original systematic review ranged from 2008-2020. This article was included in the original review as a preprint from 2020, however; it was since fully published in 2021.*

## References

1. Abbott, P.; Menzies, R.; Davison, J.; Moore, L.; Wang, H. Improving immunisation timeliness in Aboriginal children through personalised calendars. *BMC Public Health* **2013**, *13*, 598.
2. Adams, K.; Burns, C.; Liebzeit, A.; Ryschka, J.; Thorpe, S.; Browne, J. Use of participatory research and photo-voice to support urban Aboriginal healthy eating. *Health Soc. Care Community* **2012**, *20*, 497–505.
3. Andrews, R.M.; Kearns, T.; Connors, C.; Parker, C.; Carville, K.; Currie, B.J.; Carapetis, J.R. A regional initiative to reduce skin infections amongst aboriginal children living in remote communities of the Northern Territory, Australia. *PLoS Negl. Trop. Dis.* **2009**, *3*, e554.
4. Anikeeva, O.; Katterl, R.; Bywood, P. The Closing the Gap Initiative—Successes and ongoing challenges for divisions of general practice. *Aust. Fam. Physician.* **2012**, *41*, 523–527.
5. Anstey, K.J.; Kiely, K.M.; Booth, H.; Birrell, C.L.; Butterworth, P.; Byles, J.; Luszcz, M.A.; Gibson, R. Indigenous Australians are under-represented in longitudinal ageing studies. *Aust. N. Z. J. Public Health* **2011**, *35*, 331–336.
6. Armstrong, G.; Sutherland, G.; Pross, E.; Mackinnon, A.; Reavley, N.; Jorm, A.F. Talking about suicide: An uncontrolled trial of the effects of an Aboriginal and Torres Strait Islander mental health first aid program on knowledge, attitudes and intended and actual assisting actions. *PLoS One* **2020**, *15*, e0244091.
7. Arrow, P.; Piggott, S.; Carter, S.; McPhee, R.; Atkinson, D.; Mackean, T.; Kularatna, S.; Tonmukayakul, U.; Brennan, D.; Nanda, S.; et al. Atraumatic restorative treatments in Australian Aboriginal communities: A cluster-randomized trial. *JDR Clin. Trans. Res.* **2021**, *6*, 430–439.
8. Askew, D.A.; Guy, J.; Lyall, V.; Egert, S.; Rogers, L.; Pokino, L.A.; Manton-Williams, P.; Schluter, P.J. A mixed methods exploratory study tackling smoking during pregnancy in an urban Aboriginal and Torres Strait Islander primary health care service. *BMC Public Health* **2019**, *19*, 343.
9. Askew, D.A.; Togni, S.J.; Schluter, P.J.; Rogers, L.; Egert, S.; Potter, N.; Hayman, N.E.; Cass, A.; Brown, A.D.H. Investigating the feasibility, acceptability and appropriateness of outreach case management in an urban Aboriginal and Torres Strait Islander primary health care service: A mixed methods exploratory study. *BMC Health Serv. Res.* **2016**, *16*, 178.
10. Atkinson, J.R.; Boudville, A.I.; Stanford, E.E.; Lange, F.D.; Anjou, M.D.. Australian Football League clinics promoting health, hygiene and trachoma elimination: The Northern Territory experience. *Aust. J. Prim. Health* **2014**, *20*, 334–338.
11. Bailie, J.; Schierhout, G.; Laycock, A.; Kelaher, M.; Percival, N.; O'Donoghue, L.; McNeair, T.; Bailie, R. Determinants of access to chronic illness care: A mixed-methods evaluation of a national multifaceted chronic disease package for Indigenous Australians. *BMJ Open* **2015**, *5*, e008103.
12. Bailie, R.S.; McDonald, E.L.; Stevens, M.; Guthridge, S.; Brewster, D.R. Evaluation of an Australian indigenous housing programme: Community level impact on crowding, infrastructure function and hygiene. *J. Epidemiol. Community Health* **2011**, *65*, 432–437.
13. Barrett, E.; Salem, L.; Wilson, S.; O'Neill, C.; Davis, K.; Bagnulo, S. Chronic kidney disease in an Aboriginal population: A nurse practitioner-led approach to management. *Aust. J. Rural. Health* **2015**, *23*, 318–321.
14. Bar-Zeev, Y.; Bovill, M.; Bonevski, B.; Gruppetta, M.; Oldmeadow, C.; Palazzi, K.; Atkins, L.; Reath, J.; Gould, G.S. Improving smoking cessation care in pregnancy at Aboriginal Medical Services: 'ICAN QUIT in Pregnancy' step-wedge cluster randomised study. *BMJ Open* **2019**, *9*, e025293.
15. Battersby, M.; Lawn, S.; Kowanko, I.; Bertossa, S.; Trowbridge, C.; Liddicoat, R. Chronic condition self-management support for Aboriginal people: Adapting tools and training. *Aust. J. Rural. Health* **2018**, *26*, 232–237.
16. Bennett-Levy, J.; Singer, J.; DuBois, S.; Hyde, K. Translating e-mental health into practice: What are the barriers and enablers to e-mental health implementation by Aboriginal and Torres Strait Islander health professionals? *J. Med. Internet. Res.* **2017**, *19*, e1.
17. Berends, L.; Halliday, R. Capacity building and social marketing promotes healthy lifestyle behaviour in an Australian Aboriginal community. *Aust. J. Rural. Health* **2018**, *26*, 279–283.
18. Bernardes, C.M.; Martin, J.; Cole, P.; Kitchener, T.; Cowburn, G.; Garvey, G.; Walpole, E.; Valery, P.C. Lessons learned from a pilot study of an Indigenous patient navigator intervention in Queensland, Australia. *Eur. J. Cancer Care* **2018**, *27*, e12714.
19. Bertilone, C.; McEvoy, S. Success in Closing the Gap: Favourable neonatal outcomes in a metropolitan Aboriginal Maternity Group Practice Program. *Med. J. Aust.* **2015**, *203*, 262.
20. Bierbaum, M.; Plueckhahn, T.; Roth, F.; McNamara, C.; Ramsey, I.; Corsini, N. Challenges to uptake of cancer education resources by rural Aboriginal Health Workers: The Cancer Healing Messages flipchart experience. *Rural. Remote Health* **2017**, *17*, 4199.



21. Biggs, K.; Walsh, J.; Ooi, C. Deadly Liver Mob: Opening the door—Improving sexual health pathways for Aboriginal people in Western Sydney. *Sex Health* **2016**, *13*, 457–464.
22. Binks, M.J.; Moberley, S.A.; Balloch, A.; Leach, A.J.; Nelson, S.; Hare, K.M.; Wilson, C.; Morris, P.S.; Nelson, J.; Chatfield, M.D.; et al. PneuMum: Impact from a randomised controlled trial of maternal 23-valent pneumococcal polysaccharide vaccination on middle ear disease amongst Indigenous infants, Northern Territory, Australia. *Vaccine* **2015**, *33*, 6579–6587.
23. Binks, M.J.; Moberley, S.A.; Balloch, A.; Leach, A.J.; Nelson, S.; Hare, K.M.; Wilson, C.; Nelson, J.; Morris, P.S.; Ware, R.S.; et al. Impact of the 23-valent pneumococcal polysaccharide vaccination in pregnancy against infant acute lower respiratory infections in the Northern Territory of Australia. *Pneumonia* **2018**, *10*, 13.
24. Bird, K.; Fitts, M.S.; Clough, A.R. Alcohol management plans in Indigenous communities in Queensland (Australia) may have unintended implications for the care of children. *Health Justice* **2016**, *4*, 8.
25. Black, A.P.; Vally, H.; Morris, P.; Daniel, M.; Esterman, A.; Karschimkus, C.S.; O'Dea, K. Nutritional impacts of a fruit and vegetable subsidy programme for disadvantaged Australian Aboriginal children. *Br. J. Nutr.* **2013**, *110*, 2309–2317.
26. Black, A.P.; Vally, H.; Morris, P.S.; Daniel, M.; Esterman, A.J.; Smith, F.E.; O'Dea, K. Health outcomes of a subsidised fruit and vegetable program for Aboriginal children in northern New South Wales. *Med. J. Aust.* **2013**, *199*, 46–50.
27. Black, A.P.; Vally, H.; Morris, P.; Daniel, M.; Esterman, A.; Smith, F.; O'Dea, K. High folate levels in Aboriginal children after subsidised fruit and vegetables and mandatory folic acid fortification. *Aust. N. Z. J. Public Health* **2014**, *38*, 241–246.
28. Blignault, I.; Haswell, M.; Jackson Pulver, L. The value of partnerships: Lessons from a multi-site evaluation of a national social and emotional wellbeing program for Indigenous youth. *Aust. N. Z. J. Public Health* **2016**, *40* (Suppl. S1), S53–S58.
29. Borg, K.; Sutton, K.; Beasley, M.; Tull, F.; Faulkner, N.; Halliday, J.; Knott, C.; Bragge, P. Communication-based interventions for increasing influenza vaccination rates among Aboriginal children: A randomised controlled trial. *Vaccine* **2018**, *36*, 6790–6795.
30. Bowen, A.C.; Harris, T.; Holt, D.C.; Giffard, P.M.; Carapetis, J.R.; Campbell, P.T.; McVernon, J.; Tong, S.Y.. Whole genome sequencing reveals extensive community-level transmission of group A Streptococcus in remote communities. *Epidemiol. Infect.* **2016**, *144*, 1991–1998.
31. Bowen, A.C.; Tong, S.Y.; Chatfield, M.D.; Carapetis, J.R. The microbiology of impetigo in indigenous children: Associations between Streptococcus pyogenes, Staphylococcus aureus, scabies, and nasal carriage. *BMC Infect. Dis.* **2014**, *14*, 727.
32. Boyle, J.; Hollands, G.; Beck, S.; Hampel, G.; Wapau, H.; Arnot, M.; Browne, L.; Teede, H.J.; Moran, L.J. Process evaluation of a pilot evidence-based Polycystic Ovary Syndrome clinic in the Torres Strait. *Aust. J. Rural. Health* **2017**, *25*, 175–181.
33. Bradley, C.; Hengel, B.; Crawford, K.; Elliott, S.; Donovan, B.; Mak, D.B.; Nattabi, B.; Johnson, D.; Guy, R.; Fairley, C.K.; et al. Establishment of a sentinel surveillance network for sexually transmissible infections and blood borne viruses in Aboriginal primary care services across Australia: The ATLAS project. *BMC Health Serv. Res.* **2020**, *20*, 769.
34. Bradshaw, S.; Hellwig, L.; Peate, D.; Wilson, A. Promoting the uptake of preventative Aboriginal child health policy in Western Australia. *Aust. J. Rural. Health* **2015**, *23*, 313–317.
35. Brimblecombe, J.; Bailie, R.; van den Boogaard, C.; Wood, B.; Liberato, S.C.; Ferguson, M.; Coveney, J.; Jaenke, R.; Ritchie, J. Feasibility of a novel participatory multi-sector continuous improvement approach to enhance food security in remote Indigenous Australian communities. *SSM Popul. Health* **2017**, *3*, 566–576.
36. Brimblecombe, J.; Ferguson, M.; Barzi, F.; Brown, C.; Ball, K. Mediators and moderators of nutrition intervention effects in remote Indigenous Australia. *Br. J. Nutr.* **2018**, *119*, 1424–1433.
37. Brimblecombe, J.; Ferguson, M.; Chatfield, M.D.; Liberato, S.C.; Gunther, A.; Ball, K.; Moodie, M.; Miles, E.; Magnus, A.; Mhurchu, C.N.; et al. Effect of a price discount and consumer education strategy on food and beverage purchases in remote Indigenous Australia: A stepped-wedge randomised controlled trial. *Lancet Public Health* **2017**, *2*, e82–e95.
38. Brown, C.; Laws, C.; Leonard, D.; Campbell, S.; Merone, L.; Hammond, M.; Thompson, K.; Canuto, K.; Brimblecombe, J. Healthy Choice Rewards: A feasibility trial of incentives to influence consumer food choices in a remote Australian Aboriginal community. *Int. J. Environ. Res. Public Health* **2019**, *16*, 112.
39. Browne, J.; Gleeson, D.; Adams, K.; Minniecon, D.; Hayes, R. Strengthening Aboriginal and Torres Strait Islander health policy: Lessons from a case study of food and nutrition. *Public Health Nutr.* **2019**, *22*, 2868–2878.
40. Browne, J.; D'Amico, E.; Thorpe, S.; Mitchell, C. Feltman: Evaluating the acceptability of a diabetes education tool for Aboriginal health workers. *Aust. J. Prim. Health* **2014**, *20*, 319–322.

41. Browne, J.; MacDonald, C.; Egan, M.; Delbridge, R.; McAleese, A.; Morley, B.; Atkinson, P. You wouldn't eat 16 teaspoons of sugar-so why drink it? Aboriginal and Torres Strait Islander responses to the LiveLighter sugary drink campaign. *Health Promot. J. Austr.* **2019**, *30*, 212–218.
42. Burgess P, Mileran A, Bailie, R. Beyond the mainstream - health gains in remote aboriginal communities. *Aust Fam Physician* 2008; 37: 986-988.
43. Cameron, S.; Dillon, H.; Glyde, H.; Kanthan, S.; Kania, A. Prevalence and remediation of spatial processing disorder (SPD) in Indigenous children in regional Australia. *Int. J. Audiol.* **2014**, *53*, 326–335.
44. Campbell, M.A.; Finlay, S.; Lucas, K.; Neal, N.; Williams, R. Kick the habit: A social marketing campaign by Aboriginal communities in NSW. *Aust. J. Prim. Health* **2014**, *20*, 327–333.
45. Campbell, S.; McCalman, J.; Redman-MacLaren, M.; Canuto, K.; Vine, K.; Sewter, J.; McDonald, M. Implementing the Baby One Program: A qualitative evaluation of family-centred child health promotion in remote Australian Aboriginal communities. *BMC Pregnancy Childbirth* **2018**, *18*, 73.
46. Canuto, K.J.; Spagnoletti, B.; McDermott, R.A.; Cargo, M. Factors influencing attendance in a structured physical activity program for Aboriginal and Torres Strait Islander women in an urban setting: A mixed methods process evaluation. *Int. J. Equity Health* **2013**, *12*, 11.
47. Canuto, K.; Cargo, M.; Li, M.; D'Onise, K.; Esterman, A.; McDermott, R. Pragmatic randomised trial of a 12-week exercise and nutrition program for Aboriginal and Torres Strait Islander women: Clinical results immediate post and 3 months follow-up. *BMC Public Health* **2012**, *12*, 993.
48. Cargo, M.; Marks, E.; Brimblecombe, J.; Scarlett, M.; Maypilama, E.; Dhurrkay, J.G.; Daniel, M. Integrating an ecological approach into an Aboriginal community-based chronic disease prevention program: A longitudinal process evaluation. *BMC Public Health* **2011**, *11*, 299.
49. Cartwright, K.; Gray, D.; Fewings, E. Demonstrating Impact: Lessons learned from the Queensland Aboriginal and Islander Health Council's AOD-Our-Way program. *Int. J. Environ. Res. Public Health* **2018**, *15*, 450.
50. Cashman, P.M.; Allan, N.A.; Clark, K.K.; Butler, M.T.; Massey, P.D.; Durrheim, D.N. Closing the gap in Australian Aboriginal infant immunisation rates—The development and review of a pre-call strategy. *BMC Public Health* **2016**, *16*, 514.
51. Causer, L.M.; Hengel, B.; Natoli, L.; Tangey, A.; Badman, S.G.; Tabrizi, S.N.; Whiley, D.; Ward, J.; Kaldor, J.M.; Guy, R.J. A field evaluation of a new molecular-based point-of-care test for chlamydia and gonorrhoea in remote Aboriginal health services in Australia. *Sex Health* **2015**, *12*, 27–33.
52. Chambers, A.H.; Tomnay, J.; Stephens, K.; Crouch, A.; Whiteside, M.; Love, P.; McIntosh, L.; Waples Crowe, P. Facilitators of community participation in an Aboriginal sexual health promotion initiative. *Rural Remote Health* **2018**, *18*, 4245.
53. Chenhall, R. What's in a rehab? Ethnographic evaluation research in Indigenous Australian residential alcohol and drug rehabilitation centres. *Anthropol. Med.* **2008**, *15*, 105–116.
54. Christou, A.; Thompson, S.C. Missed opportunities in educating Aboriginal Australians about bowel cancer screening: Whose job is it anyway? *Contemp. Nurse* **2013**, *46*, 59–69.
55. Ciccone, N.; Armstrong, E.; Hersh, D.; Adams, M.; McAllister, M. The Wangi (talking) project: A feasibility study of a rehabilitation model for aboriginal people with acquired communication disorders after stroke. *Int. J. Speech Lang Pathol.* **2019**, *21*, 305–316.
56. Clapham, K.; Bennett-Brook, K.; Hunter, K. The role of Aboriginal family workers in delivering a child safety-focused home visiting program for Aboriginal families in an urban region of New South Wales. *Health Promot. J. Austr.* **2018**, *29*, 173–182.
57. Clark, R.A.; Fredericks, B.; Buitendyk, N.J.; Adams, M.J.; Howie-Esquivel, J.; Dracup, K.A.; Berry, N.M.; Atherton, J.; Johnson, S. Development and feasibility testing of an education program to improve knowledge and self-care among Aboriginal and Torres Strait Islander patients with heart failure. *Rural. Remote Health* **2015**, *15*, 38–50.
58. Clifford, A.; Shakeshaft, A. Evidence-based alcohol screening and brief intervention in Aboriginal Community Controlled Health Services: Experiences of health-care providers. *Drug Alcohol Rev.* **2011**, *30*, 55–62.
59. Clifford, A.; Shakeshaft, A.; Deans, C. Training and tailored outreach support to improve alcohol screening and brief intervention in Aboriginal Community Controlled Health Services. *Drug Alcohol Rev.* **2013**, *32*, 72–79.
60. Coffin, J. The Nguudu Barndimanmanha project—Improving social and emotional wellbeing in Aboriginal youth through equine assisted learning. *Front. Public Health* **2019**, *7*, 278.
61. Conigrave, K.; Freeman, B.; Carroll, T.; Simpson, L.; Lee, K.; Wade, V.; Kiel, K.; Ella, S.; Becker, K.; Freeburn, B. The Alcohol Awareness project: Community education and brief intervention in an urban Aboriginal setting. *Health Promot. J. Austr.* **2012**, *23*, 219–225.

62. Cooper, P.; Kohler, M.; Blunden, S. Sleep and academic performance in Indigenous Australian children from a remote community: An exploratory study. *J. Paediatr. Child Health* **2012**, *48*, 122–127.
63. Cresp, R.; Clarke, K.; McAuley, K.E.; McAullay, D.; Moylan, C.A.; Peter, S.; Chaney, G.M.; Cook, A.; Edmond, K.M. Effectiveness of the Koorliny Moort out-of-hospital health care program for Aboriginal and Torres Strait Islander children in Western Australia. *Med. J. Aust.* **2016**, *204*, 234–237.
64. Crouch, A.; Robertson, H.; Fagan, P. Hip hopping the gap—Performing arts approaches to sexual health disadvantage in young people in remote settings. *Australas. Psychiatr.* **2011**, *19* (Suppl S1), S34–S37.
65. Cuesta-Briand, B.; Bessarab, D.; Shahid, S.; Thompson, S.C. Addressing unresolved tensions to build effective partnerships: Lessons from an Aboriginal cancer support network. *Int. J. Equity Health* **2015**, *14*, 123.
66. D'Abbs, P.; Schmidt, B.; Dougherty, K.; Senior, K. Implementing a chronic disease strategy in two remote Indigenous Australian settings: A multi-method pilot evaluation. *Aust. J. Rural. Health* **2008**, *16*, 67–74.
67. Davey, M.; Moore, W.; Walters, J. Tasmanian Aborigines step up to health: Evaluation of a cardiopulmonary rehabilitation and secondary prevention program. *BMC Health Serv. Res.* **2014**, *14*, 349.
68. Davies, K.; Read, D.M.Y.; Booth, A.; Turner, N.; Gottschall, K.; Perkins, D. Connecting with social and emotional well-being in rural Australia: An evaluation of 'We-Yarn', an Aboriginal gatekeeper suicide prevention workshop. *Aust. J. Rural. Health* **2020**, *28*, 579–587.
69. Daws, K.; Punch, A.; Winters, M.; Posenelli, S.; Willis, J.; MacIsaac, A.; Rahman, M.A.; Worrall-Carter, L. Implementing a working together model for Aboriginal patients with acute coronary syndrome: An Aboriginal Hospital Liaison Officer and a specialist cardiac nurse working together to improve hospital care. *Aust. Health Rev.* **2014**, *38*, 552–556.
70. Digiaco, M.; Abbott, P.; Davison, J.; Moore, L.; Davidson, P.M. Facilitating uptake of Aboriginal Adult Health Checks through community engagement and health promotion. *Qual. Prim. Care* **2010**, *18*, 57–64.
71. Dimer, L.; Dowling, T.; Jones, J.; Cheetham, C.; Thomas, T.; Smith, J.; McManus, A.; Maiorana, A.J. Build it and they will come: Outcomes from a successful cardiac rehabilitation program at an Aboriginal Medical Service. *Aust. Health Rev.* **2013**, *37*, 79–82.
72. Dimitropoulos, Y.; Gwynne, K.; Blinkhorn, A.; Holden, A. A school fluoride varnish program for Aboriginal children in rural New South Wales, Australia. *Health Promot. J. Austr.* **2019**, *31*, 172–176.
73. Dimitropoulos, Y.; Holden, A.; Gwynne, K.; Do, L.; Byun, R.; Sohn, W. Outcomes of a co-designed, community-led oral health promotion program for Aboriginal children in rural and remote communities in New South Wales, Australia. *Community Dent. Health* **2020**, *29*, 132–137.
74. Dingwall, K.M.; Gray, A.O.; McCarthy, A.R.; Delima, J.F.; Bowden, S.C. Exploring the reliability and acceptability of cognitive tests for Indigenous Australians: A pilot study. *BMC Psychol.* **2017**, *5*, 1–16.
75. Divaris, K.; Preisser, J.S.; Slade, G.D. Surface-specific efficacy of fluoride varnish in caries prevention in the primary dentition: Results of a community randomized clinical trial. *Caries Res.* **2013**, *47*, 78–87.
76. Dorrington, M.S.; Herceg, A.; Douglas, K.; Tongs, J.; Bookallil, M. Increasing Pap smear rates at an urban Aboriginal Community Controlled Health Service through translational research and continuous quality improvement. *Aust. J. Prim. Health* **2015**, *21*, 417–422.
77. Doyle, J.; Atkinson-Briggs, S.; Atkinson, P.; Firebrace, B.; Calleja, J.; Reilly, R.; Cargo, M.; Riley, T.; Crump, T.; Rowley, K. A prospective evaluation of first people's health promotion program design in the 190ulburn-murray rivers region. *BMC Health Serv. Res.* **2016**, *16*, 26.
78. Duley, P.; Botfield, J.R.; Ritter, T.; Wicks, J.; Brassil, A. The Strong Family Program: An innovative model to engage Aboriginal and Torres Strait Islander youth and Elders with reproductive and sexual health community education. *Health Promot. J. Austr.* **2017**, *28*, 132–138.
79. Durey, A.; Halkett, G.; Berg, M.; Lester, L.; Kickett, M. Does one workshop on respecting cultural differences increase health professionals' confidence to improve the care of Australian Aboriginal patients with cancer? An evaluation. *BMC Health Serv. Res.* **2017**, *17*, 660.
80. Eades, S.J.; Sanson-Fisher, R.W.; Wenitong, M.; Panaretto, K.; D'Este, C.; Gilligan, C.; Stewart, J. An intensive smoking intervention for pregnant Aboriginal and Torres Strait Islander women: A randomised controlled trial. *Med. J. Aust.* **2012**, *197*, 42–46.
81. Edmunds, K.; Searles, A.; Neville, J.; Ling, R.; McCalman, J.; Mein, J. Apunipima baby basket program: A retrospective cost study. *BMC Pregnancy Childbirth* **2016**, *16*, 337.
82. Eley, R.; Gorman, D. Didgeridoo playing and singing to support asthma management in Aboriginal Australians. *J. Rural. Health* **2010**, *26*, 100–104.
83. Eley, R.; Gorman, D.; Gately, J. Didgeridoos, songs and boomerangs for asthma management. *Health Promot. J. Austr.* **2010**, *21*, 39–44.
84. Elliott, G.; Smith, A.C.; Bensink, M.E.; Brown, C.; Stewart, C.; Perry, C.; Scuffham, P. The feasibility of a community-based mobile telehealth screening service for Aboriginal and Torres Strait Islander children in Australia. *Telemed. J. E. Health* **2010**, *16*, 950–956.

85. Farnbach, S.; Gee, G.; Eades, A.M.; Evans, J.R.; Fernando, J.; Hammond, B.; Simms, M.; DeMasi, K.; Glozier, N.; Brown, A.; et al. Process evaluation of the Getting it Right study and acceptability and feasibility of screening for depression with the aPHQ-9. *BMC Public Health* **2019**, *19*, 1207.
86. Ferson, M.J.; Ressler, K.A.; Nurkic, A.; Spokes, P.J. Gonorrhoea enhanced surveillance for indigenous status and risk factors in the south-eastern Sydney population. *Commun. Dis. Intell.* **2019**, *43*, 23.
87. Fletcher, J.; Hogben, J.; Neilson, R.; Lalara, R.D.; Reid, C. Examining the quality of phonological representations in Anindilyakwa children in Australia. *Int. J. Lang Commun. Disord.* **2015**, *50*, 842–848.
88. Genat, B.; Browne, J.; Thorpe, S.; MacDonald, C. Sectoral system capacity development in health promotion: Evaluation of an Aboriginal nutrition program. *Contemp. Nurse* **2016**, *27*, 236–242.
89. Gibson-Helm, M.E.; Bailie, J.; Matthews, V.; Laycock, A.F.; Boyle, J.A.; Bailie, R.S. Identifying evidence-practice gaps and strategies for improvement in Aboriginal and Torres Strait Islander maternal health care. *PLoS One* **2018**, *13*, e0192262.
90. Gordon, R.; Richards, N. The Chronic Care for Aboriginal People program in NSW. *NSW Public Health Bull.* **2012**, *23*, 77–80.
91. Gould, G.S.; Bar-Zeev, Y.; Bovill, M.; Atkins, L.; Gruppeta, M.; Clarke, M.J.; Bonevski, B. Designing an implementation intervention with the Behaviour Change Wheel for health provider smoking cessation care for Australian Indigenous pregnant women. *Implement. Sci.* **2017**, *12*, 114.
92. Gould, G.S.; Bovill, M.; Pollock, L.; Bonevski, B.; Gruppeta, M.; Atkins, L.; Carson-Chahhoud, K.; Boydell, K.M.; Gribbin, G.R.; Oldmeadow, C.; et al. Feasibility and acceptability of Indigenous Counselling and Nicotine (ICAN) QUIT in Pregnancy multicomponent implementation intervention and study design for Australian Indigenous pregnant women: A pilot cluster randomised step-wedge trial. *Addict. Behav.* **2019**, *90*, 176–190.
93. Govil, D.; Lin, I.; Dodd, T.; Cox, R.; Moss, P.; Thompson, S.; Maiorana, A. Identifying culturally appropriate strategies for coronary heart disease secondary prevention in a regional Aboriginal Medical Service. *Aust. J. Prim. Health* **2014**, *20*, 266–272.
94. Graham, S.; Guy, R.J.; Wand, H.C.; Kaldor, J.M.; Donovan, B.; Knox, J.; McCowen, D.; Bullen, P.; Booker, J.; O'Brien, C.; A sexual health quality improvement program (SHIMMER) triples chlamydia and gonorrhoea testing rates among young people attending Aboriginal primary health care services in Australia. *BMC Infect. Dis.* **2015**, *15*, 370.
95. Guy, R.J.; Ward, J.; Causer, L.M.; Natoli, L.; Badman, S.G.; Tangey, A.; Hengel, B.; Wand, H.; Whiley, D.; Tabrizi, S.N.; et al. Molecular point-of-care testing for chlamydia and gonorrhoea in Indigenous Australians attending remote primary health services (TTANGO): A cluster-randomised, controlled, crossover trial. *Lancet Infect. Dis.* **2018**, *18*, 1117–1126.
96. Guy, R.; Ward, J.; Wand, H.; Rumbold, A.; Garton, L.; Hengel, B.; Silver, B.; Taylor-Thomson, D.; Knox, J.; McGregor, S.; et al. Coinfection with Chlamydia trachomatis, Neisseria gonorrhoeae and Trichomonas vaginalis: A cross-sectional analysis of positivity and risk factors in remote Australian Aboriginal communities. *Sex Transm. Infect.* **2015**, *91*, 201–206.
97. Haag, D.G.; Jamieson, L.M.; Hedges, J.; Smithers, L.G. Is There an Association between Breastfeeding and Dental Caries among Three-Year-Old Australian Aboriginal Children? *Nutrients* **2019**, *11*, 2811.
98. Haigh, M.; Shahid, S.; O'Connor, K.; Thompson, S.C. Talking about the not talked about: Use of, and reactions to, a DVD promoting bowel cancer screening to Aboriginal people. *Aust. N. Z. J. Public Health* **2016**, *40*, 548–552.
99. Harch, S.; Reeve, D.; Reeve, C. Management of type 2 diabetes—A community partnership approach. *Aust. Fam. Physician.* **2012**, *41*, 73–76.
100. Hare, K.M.; Grimwood, K.; Chang, A.B.; Chatfield, M.D.; Valery, P.C.; Leach, A.J.; Smith-Vaughan, H.C.; Morris, P.S.; Byrnes, C.A.; Torzillo, P.J.; et al. Nasopharyngeal carriage and macrolide resistance in Indigenous children with bronchiectasis randomized to long-term azithromycin or placebo. *Eur. J. Clin. Microbiol. Infect. Dis.* **2015**, *34*, 2275–2285.
101. Haynes, M.; O'Rourke, T.; Nash, D.; Mitchell, A.G.; Phillips, J.; Bessarab, D.; Walker, R.; Cook, J.; Ralph, A.P. Aboriginal and Torres Strait Islander preferences for healthcare settings: Effective use of design images in survey research. *Aust. Health Rev.* **2019**, *44*, 222–227.
102. Hearn, S.; Nancarrow, H.; Rose, M.; Massi, L.; Wise, M.; Conigrave, K.; Barnes, I.; Bauman, A. Evaluating NSW SmokeCheck: A culturally specific smoking cessation training program for health professionals working in Aboriginal health. *Health Promot. J. Austr.* **2011**, *22*, 189–195.
103. Hickey, S.; Couchman, K.; Stapleton, H.; Roe, Y.; Kildea, S. Experiences of health service providers establishing an Aboriginal-Mainstream partnership to improve maternity care for Aboriginal and Torres Strait Islander families in an urban setting. *Eval. Program. Plann.* **2019**, *77*, 101705.

104. Hogg, S.; Roe, Y.; Mills, R. Implementing evidence-based continuous quality improvement strategies in an urban Aboriginal Community Controlled Health Service in South East Queensland: A best practice implementation pilot. *JBIC Database System Rev. Implement Rep.* **2017**, *15*, 178–187.
105. Hotu, C.; Remond, M.; Maguire, G.; Ekinci, E.; Cohen, N. Impact of an integrated diabetes service involving specialist outreach and primary health care on risk factors for micro- and macrovascular diabetes complications in remote Indigenous communities in Australia. *Aust. J. Rural. Health* **2018**, *26*, 394–399.
106. Hoy, W.E.; Reid, C.M.; Huq, M.; McLeod, B.J.; Mott, S.A. A randomised controlled trial of potential for pharmacologic prevention of new-onset albuminuria, hypertension and diabetes in a remote Aboriginal Australian community, 2008–2013. *Contemp. Clin. Trials Commun.* **2019**, *14*, 100323.
107. Hu, J.; Basit, T.; Nelson, A.; Bartlett, A. Changes in exercise capacity and anthropometric measures after Work It Out—a holistic chronic disease self-management program for urban Aboriginal and Torres Strait Islander people. *Public Health* **2019**, *174*, 49–55.
108. Hu, J.; Basit, T.; Nelson, A.; Crawford, E.; Turner, L. Does attending Work It Out—A chronic disease self-management program—Affect the use of other health services by urban Aboriginal and Torres Strait Islander people with or at risk of chronic disease? A comparison between program participants and non-participants. *Aust. J. Prim. Health* **2019**, *25*, 464–470.
109. Hume, A.; Wetten, A.; Feeney, C.; Taylor, S.; O'Dea, K.; Brimblecombe, J. Remote school gardens: Exploring a cost-effective and novel way to engage Australian Indigenous students in nutrition and health. *Aust. N. Z. J. Public Health* **2014**, *38*, 235–240.
110. Isaacs, A.; Lampitt, B. The Koorie Men's Health Day: An innovative model for early detection of mental illness among rural Aboriginal men. *Australas Psychiatr.* **2014**, *22*, 56–61.
111. Ivers, R.; Jackson, B.; Levett, T.; Wallace, K.; Winch, S. Home to health care to hospital: Evaluation of a cancer care team based in Australian Aboriginal primary care. *Aust. J. Rural. Health* **2019**, *27*, 88–92.
112. Jacups, S.P.; Kinchin, I.; McConnon, K.M. Ear, nose, and throat surgical access for remote living Indigenous children: What is the least costly model? *J. Eval. Clin. Pract.* **2018**, *24*, 1330–1338.
113. Jainullabudeen, T.A.; Lively, A.; Singleton, M.; Shakeshaft, A.; Tsey, K.; McCalman, J.; Doran, C.; Jacups, S. The impact of a community-based risky drinking intervention (Beat da Binge) on Indigenous young people. *BMC Public Health* **2015**, *15*, 1319.
114. Jamieson, L.; Bradshaw, J.; Lawrence, H.; Broughton, J.; Venner, K. Fidelity of Motivational Interviewing in an early childhood caries intervention involving Indigenous Australian mothers. *J. Health Care Poor Underserved* **2016**, *27*, 125–138.
115. Jamieson, L.M.; Sajiv, C.; Cass, A.; Maple-Brown, L.J.; Skilton, M.R.; Kapellas, K.; Pawar, B.; Arrow, P.; Askie, L.M.; Hoy, W.; et al. Lessons learned from a periodontal intervention to reduce progression of chronic kidney disease among Aboriginal Australians. *BMC Res. Notes* **2020**, *13*, 1–5.
116. Jamieson, L.; Smithers, L.; Hedges, J.; Mills, H.; Kapellas, K.; Ha, D.; Do, L.; Ju, X. Follow-up of Intervention to Prevent Dental Caries Among Indigenous Children in Australia: A Secondary Analysis of a Randomized Clinical Trial. *JAMA Netw Open* **2019**, *2*, e1915611.
117. Jamieson, L.M.; Smithers, L.G.; Hedges, J.; Aldis, J.; Mills, H.; Kapellas, K.; Lawrence, H.P.; Broughton, J.R.; Ju, X. Follow-up of an Intervention to Reduce Dental Caries in Indigenous Australian Children: A Secondary Analysis of a Randomized Clinical Trial. *JAMA Netw Open* **2019**, *2*, e190648.
118. Jamieson, L.M.; Smithers, L.G.; Hedges, J.; Parker, E.; Mills, H.; Kapellas, K.; Lawrence, H.P.; Broughton, J.R.; Ju, X. Dental Disease Outcomes Following a 2-Year Oral Health Promotion Program for Australian Aboriginal Children and Their Families: A 2-Arm Parallel, Single-blind, Randomised Controlled Trial. *EClinicalMedicine* **2018**, *1*, 43–50.
119. Janca, A.; Lyons, Z.; Balaratnasingam, S.; Parfitt, D.; Davison, S.; Laugharne, J. Here and Now Aboriginal Assessment: Background, development and preliminary evaluation of a culturally appropriate screening tool. *Australas Psychiatr.* **2015**, *23*, 287–292.
120. Janca, A.; Lyons, Z.; Gaspar, J. Here and Now Aboriginal Assessment (HANAA): A follow-up survey of users. *Australas Psychiatr.* **2017**, *25*, 288–289.
121. Johnson, D.R.; McDermott, R.A.; Clifton, P.M.; D'Onise, K.; Taylor, S.M.; Preece, C.L.; Schmidt, B.A. Characteristics of Indigenous adults with poorly controlled diabetes in north Queensland: Implications for services. *BMC Public Health* **2015**, *15*, 325.
122. Ju, X.; Brennan, D.; Parker, E. Efficacy of an oral health literacy intervention among Indigenous Australian adults. *Community Dent. Oral. Epidemiol.* **2017**, *45*, 413–426.
123. Kanagasingam, Y.; Boyle, J.; Vignarajan, J.; Di, Xiao; Ming, Zhang Establishing an indigenous tele-eye care service. *Conf. Proc. IEEE Eng. Med. Biol. Soc.* **2015**, *2015*, 1608–1611.

124. Kapellas, K.; Do, L.G.; Bartold, P.M.; Skilton, M.R.; Maple-Brown, L.J.; O'Dea, K.; Brown, A.; Celermajer, D.S.; Slade, G.D.; Jamieson, L.M. Effects of full-mouth scaling on the periodontal health of Indigenous Australians: A randomized controlled trial. *J. Clin. Periodontol.* **2013**, *40*, 1016–1024.
125. Kapellas, K.; Maple-Brown, L.J.; Jamieson, L.M.; Do, L.G.; O'Dea, K.; Brown, A.; Cai, T.Y.; Anstey, N.M.; Sullivan, D.R.; Wang, H.; Celermajer, D.S.; et al. Effect of periodontal therapy on arterial structure and function among aboriginal australians: A randomized, controlled trial. *Hypertension* **2014**, *64*, 702–708.
126. Kapellas, K.; Mejia, G.; Bartold, P.M.; Skilton, M.R.; Maple-Brown, L.J.; Slade, G.D.; O'Dea, K.; Brown, A.; Celermajer, D.S.; Jamieson, L.M.; et al. Periodontal therapy and glycaemic control among individuals with type 2 diabetes: Reflections from the PerioCardio study. *Int. J. Dent. Hyg.* **2017**, *15*, e42–e51.
127. Khalil, H. Successful implementation of a medication safety program for Aboriginal Health Practitioners in rural Australia. *Aust. J. Rural. Health* **2019**, *27*, 158–163.
128. Kiran, A.; Knights, J. Traditional Indigenous Games promoting physical activity and cultural connectedness in primary schools—Cluster randomised control trial. *Health Promot. J. Austr.* **2010**, *21*, 149–151.
129. Kirkham, R.; MacKay, D.; Barzi, F.; Whitbread, C.; Kirkwood, M.; Graham, S.; Van Dokkum, P.; McIntyre, H.D.; Shaw, J.E.; Brown, A.; et al. Improving postpartum screening after diabetes in pregnancy: Results of a pilot study in remote Australia. *Aust. N. Z. J. Obstet. Gynaecol.* **2019**, *59*, 430–435.
130. Lange, F.D.; Baunach, E.; McKenzie, R.; Taylor, H.R. Trachoma elimination in remote Indigenous Northern Territory communities: Baseline health-promotion study. *Aust. J. Prim. Health* **2014**, *20*, 34–40.
131. Lange, F.D.; Jones, K.; Ritte, R.; Brown, H.E.; Taylor, H.R. The impact of health promotion on trachoma knowledge, attitudes and practice (KAP) of staff in three work settings in remote Indigenous communities in the Northern Territory. *PLoS Negl. Trop. Dis.* **2017**, *11*, e0005503.
132. Leach, A.; Wood, Y.; Gadil, E.; Stubbs, E.; Morris, P. Topical ciprofloxacin versus topical framycetin-gramicidin-dexamethasone in Australian aboriginal children with recently treated chronic suppurative otitis media: A randomized controlled trial. *Pediatr. Infect. Dis. J.* **2008**, *27*, 692–698.
133. Leach, A.J.; Morris, P.S.; Mathews, J.D. Compared to placebo, long-term antibiotics resolve otitis media with effusion (OME) and prevent acute otitis media with perforation (AOMwiP) in a high-risk population: A randomized controlled trial. *BMC Pediatr.* **2008**, *8*, 23.
134. Lee, A.; Lucas, K.; Campbell, M.A.; Sarin, J. Continuing to lift the burden: Using a continuous quality improvement approach to advance Aboriginal tobacco resistance and control. *Public Health Res. Pract.* **2016**, *26*, e2651662.
135. Lee, K.S.; Conigrave, K.M.; Clough, A.R.; Wallace, C.; Silins, E.; Rawles, J. Evaluation of a community-driven preventive youth initiative in Arnhem Land, Northern Territory, Australia. *Drug Alcohol Rev.* **2008**, *27*, 75–82.
136. Liaw, S.T.; Hasan, I.; Wade, V.; Canalese, R.; Kelaher, M.; Lau, P.; Harris, M. Improving cultural respect to improve Aboriginal health in general practice: A multi-methods and multi-perspective pragmatic study. *Aust. Fam. Physician.* **2015**, *44*, 387–392.
137. Liaw, S.T.; Wade, V.; Furler, J.S.; Hasan, I.; Lau, P.; Kelaher, M.; Xuan, W.; Harris, M.F. Cultural respect in general practice: A cluster randomised controlled trial. *Med. J. Aust.* **2019**, *210*, 263–268.
138. Liberato, S.C.; Kearns, T.; Ward, F.; Brimblecombe, J. Use of electronic visual recording to aid assessment of dietary intake of Australian Aboriginal children living in remote communities. *Aust. N. Z. J. Public Health* **2016**, *40* (Suppl S1), S27–S29.
139. Lin, I.B.; Coffin, J.; O'Sullivan, P.B. Using theory to improve low back pain care in Australian Aboriginal primary care: A mixed method single cohort pilot study. *BMC Fam. Pract.* **2016**, *17*, 1–14.
140. Lobo, R.; D'Costa, B.; Forbes, L.; Ward, J. Young Deadly Free: Impact evaluation of a sexual health youth peer education program in remote Australian communities. *Sex Health* **2020**, *17*, 397–404.
141. LoGiudice, D.C.; Smith, K.; Shadforth, G.; Lindeman, M.; Carroll, E.; Atkinson, D.; Schaper, F.; Lautenschlager, N.; Murphy, R.; Flicker, L. Lungurra Ngoora—A pilot model of care for aged and disabled in a remote Aboriginal community—Can it work? *Rural. Remote Health* **2012**, *12*, 2078.
142. Lovie-Toon, Y.G.; McPhail, S.M.; Au-Yeung, Y.T.; Hall, K.K.; Chang, A.B.; Vagenas, D.; Otim, M.E.; O'Grady, K.F. The Cost of Acute Respiratory Infections With Cough Among Urban Aboriginal and Torres Strait Islander Children. *Front. Pediatr.* **2018**, *6*, 379.
143. Lowell, A.; Kildea, S.; Liddle, M.; Cox, B.; Paterson, B. Supporting aboriginal knowledge and practice in health care: Lessons from a qualitative evaluation of the strong women, strong babies, strong culture program. *BMC Pregnancy Childbirth* **2015**, *15*, 19.
144. Lukaszyk, C.; Coombes, J.; Sherrington, C.; Tiedemann, A.; Keay, L.; Mackean, T.; Clemson, L.; Cumming, R.; Broe, T.; Ivers, R. The Ironbark program: Implementation and impact of a community-based fall prevention pilot program for older Aboriginal and Torres Strait Islander people. *Health Promot. J. Austr.* **2018**, *29*, 189–198.

145. MacDonald, C.; Genat, B.; Thorpe, S.; Browne, J. Establishing health-promoting workplaces in Aboriginal community organisations: Healthy eating policies. *Aust. J. Prim. Health* **2016**, *22*, 239–243.
146. Macniven, R.; Gwynn, J.; Fujimoto, H.; Hamilton, S.; Thompson, S.C.; Taylor, K.; Lawrence, M.; Finlayson, H.; Bolton, G.; Dulvari, N.; et al. Feasibility and acceptability of opportunistic screening to detect atrial fibrillation in Aboriginal adults. *Aust. N. Z. J. Public Health* **2019**, *43*, 313–318.
147. Magnus, A.; Cobiac, L.; Brimblecombe, J.; Chatfield, M.; Gunther, A.; Ferguson, M.; Moodie, M. The cost-effectiveness of a 20% price discount on fruit, vegetables, diet drinks and water, trialled in remote Australia to improve Indigenous health. *PLoS One* **2018**, *13*, e0204005.
148. Maksimovic, L.; Shen, D.; Bandick, M.; Ettridge, K.; Eckert, M. Evaluation of the pilot phase of the ;Give up smokes for good; social marketing campaign. *Health Promot. J. Austr.* **2015**, *26*, 16–23.
149. Malseed, C.; Nelson, A.; Ware, R.; Lacey, I.; Lander, K. Deadly Choices community health events: A health promotion initiative for urban Aboriginal and Torres Strait Islander people. *Aust. J. Prim. Health* **2014**, *20*, 379–383.
150. Manifold, A.; Atkinson, D.; Marley, J.V.; Scott, L.; Cleland, G.; Edgill, P.; Singleton, S. Complex diabetes screening guidelines for high-risk adolescent Aboriginal Australians: A barrier to implementation in primary health care. *Aust. J. Prim. Health* **2019**, *25*, 501–508.
151. Marley, J.V.; Atkinson, D.; Kitaura, T.; Nelson, C.; Gray, D.; Metcalf, S.; Maguire, G.P. The Be Our Ally Beat Smoking (BOABS) study, a randomised controlled trial of an intensive smoking cessation intervention in a remote aboriginal Australian health care setting. *BMC Public Health* **2014**, *14*, 32.
152. Martin, K.; Dono, J.; Stewart, H.B.; Sparrow, A.; Miller, C.; Roder, D.; Bowden, J. Evaluation of an intervention to train health professionals working with Aboriginal and Torres Strait Islander people to provide smoking cessation advice. *Aust. N. Z. J. Public Health* **2019**, *43*, 156–162.
153. McCallum, G.B.; Morris, P.S.; Grimwood, K.; MacLennan, C.; White, A.V.; Chatfield, M.D.; Sloots, T.P.; Mackay, I.M.; Smith-Vaughan, H.; McKay, C.C.; et al. Three-weekly doses of azithromycin for indigenous infants hospitalized with bronchiolitis: A multicentre, randomized, placebo-controlled trial. *Front. Pediatr.* **2015**, *3*, 32.
154. McDonald, E.; Cunningham, T.; Slavin, N. Evaluating a handwashing with soap program in Australian remote Aboriginal communities: A pre and post intervention study design. *BMC Public Health* **2015**, *15*, 1188.
155. McHugh, L.; Binks, M.; Ware, R.S.; Snelling, T.; Nelson, S.; Nelson, J.; Dunbar, M.; Mulholland, E.K.; Andrews, R.M. Birth outcomes in Aboriginal mother-infant pairs from the Northern Territory, Australia, who received 23-valent polysaccharide pneumococcal vaccination during pregnancy, 2006–2011, the PneuMum randomised controlled trial. *Aust. N. Z. J. Obstet. Gynaecol.* **2019**, *60*, 82–87.
156. McKay, C.C.; Chang, A.B.; Versteegh, L.A.; McCallum, G.B. Culturally appropriate flipcharts improve the knowledge of common respiratory conditions among Northern Territory Indigenous families. *Health Promot. J. Austr.* **2015**, *26*, 150–153.
157. McMahon, E.; Webster, J.; Brimblecombe, J. Effect of 25% Sodium reduction on sales of a top-selling bread in remote Indigenous Australian community stores: A controlled intervention trial. *Nutrients* **2017**, *9*, 214.
158. McRae, M.; Taylor, S.J.; Swain, L.; Sheldrake, C. Evaluation of a pharmacist-led, medicines education program for Aboriginal Health Workers. *Rural. Remote Health* **2008**, *8*, 946.
159. Medlin, L.G.; Chang, A.B.; Fong, K.; Jackson, R.; Bishop, P.; Dent, A.; Hill, D.C.; Vincent, S.; O'Grady, K.A. Indigenous Respiratory Outreach Care: The first 18 months of a specialist respiratory outreach service to rural and remote Indigenous communities in Queensland, Australia. *Aust. Health Rev.* **2014**, *38*, 447–453.
160. Meihubers, S. The Bila Muuji oral health promotion partnership. *NSW Public Health Bull.* **2013**, *24*, 128–130.
161. Mendham, A.E.; Coutts, A.J.; Duffield, R. The acute effects of aerobic exercise and modified rugby on inflammation and glucose homeostasis within Indigenous Australians. *Eur. J. Appl. Physiol.* **2012**, *112*, 3787–3795.
162. Mendham, A.E.; Duffield, R.; Marino, F.; Coutts, A.J. Differences in post-exercise inflammatory and glucose regulatory response between sedentary indigenous Australian and Caucasian men completing a single bout of cycling. *Am. J. Hum. Biol.* **2014**, *26*, 208–214.
163. Mendham, A.E.; Duffield, R.; Marino, F.; Coutts, A.J. A 12-week sports-based exercise programme for inactive Indigenous Australian men improved clinical risk factors associated with type 2 diabetes mellitus. *J. Sci. Med. Sport* **2015**, *18*, 438–443.
164. Meyer, J.; Johnson, K.; Bowyer, J.; Muir, J.; Turner, A. Evaluating a health video on diabetic retinopathy. *Health Promot. J. Austr.* **2016**, *27*, 84–87.
165. Mills, K.; Gatton, M.L.; Mahoney, R.; Nelson, A. 'Work it out': Evaluation of a chronic condition self-management program for urban Aboriginal and Torres Strait Islander people, with or at risk of cardiovascular disease. *BMC Health Serv. Res.* **2017**, *17*, 680.

166. Morris, P.S.; Gadil, G.; McCallum, G.B.; Wilson, C.A.; Smith-Vaughan, H.C.; Torzillo, P.; Leach, A.J. Single-dose azithromycin versus seven days of amoxycillin in the treatment of acute otitis media in Aboriginal children (AATAAC): A double blind, randomised controlled trial. *Med. J. Aust.* **2010**, *192*, 24–29.
167. Munro, A.; Allan, J.; Shakeshaft, A.; Snijder, M. Riding the rural radio wave: The impact of a community-led drug and alcohol radio advertising campaign in a remote Australian Aboriginal community. *Aust. J. Rural. Health* **2017**, *25*, 290–297.
168. Nagel, T.; Robinson, G.; Condon, J.; Trauer, T. Approach to treatment of mental illness and substance dependence in remote Indigenous communities: Results of a mixed methods study. *Aust. J. Rural. Health* **2009**, *17*, 174–182.
169. Nguyen, H.; Zarnowiecki, D.; Segal, L.; Gent, D.; Silver, B.; Boffa, J. Feasibility of implementing infant home visiting in a Central Australian Aboriginal community. *Prev. Sci.* **2018**, *19*, 966–976.
170. Nguyen, K.H.; Smith, A.C.; Armfield, N.R.; Bensink, M.; Scuffham, P.A. Cost-effectiveness analysis of a mobile ear screening and surveillance service versus an outreach screening, surveillance and surgical service for Indigenous children in Australia. *PLoS One* **2015**, *10*, e0138369.
171. Noble, N.; Paul, C.; Carey, M.; Blunden, S.; Turner, N. A randomised trial assessing the acceptability and effectiveness of providing generic versus tailored feedback about health risks for a high need primary care sample. *BMC Fam. Pract.* **2015**, *16*, 95.
172. O'Donoghue, L.; Percival, N.; Laycock, A.; McCalman, J.; Tsey, K.; Armit, C.; Bailie, R. Evaluating Aboriginal and Torres Strait Islander health promotion activities using audit and feedback. *Aust. J. Prim. Health* **2014**, *20*, 339–344.
173. O'Grady, K.A.; Dunbar, M.; Medlin, L.G.; Hall, K.K.; Toombs, M.; Meiklejohn, J.; McHugh, L.; Massey, P.D.; Creighton, A.; Andrews, R.M. Uptake of influenza vaccination in pregnancy amongst Australian Aboriginal and Torres Strait Islander women: A mixed-methods pilot study. *BMC Res. Notes* **2015**, *8*, 169.
174. O'Grady, K.A.; Torzillo, P.J.; Ruben, A.R.; Taylor-Thomson, D.; Valery, P.C.; Chang, A.B. Identification of radiological alveolar pneumonia in children with high rates of hospitalized respiratory infections: Comparison of WHO-defined and pediatric pulmonologist diagnosis in the clinical context. *Pediatr. Pulmonol.* **2012**, *47*, 386–392.
175. O'Halloran, R.A.; Turner, A.W. Evaluating the impact of optical coherence tomography in diabetic retinopathy screening for an Aboriginal population. *Clin. Exp. Ophthalmol.* **2018**, *46*, 116–121.
176. Ong, K.S.; Carter, R.; Vos, T.; Kelaher, M.; Anderson, I. Cost-effectiveness of interventions to prevent cardiovascular disease in Australia's indigenous population. *Heart Lung Circ.* **2014**, *23*, 414–421.
177. Panaretto, K.S.; Gardner, K.L.; Button, S.; Carson, A.; Schibasaki, R.; Wason, G.; Baker, D.; Mein, J.; Dellit, A.; Lewis, D.; et al. Prevention and management of chronic disease in Aboriginal and Islander Community Controlled Health Services in Queensland: A quality improvement study assessing change in selected clinical performance indicators over time in a cohort of services. *BMJ Open* **2013**, *3*, e002083.
178. Passmore, E.; Shepherd, B.; Milat, A.; Maher, L.; Hennessey, K.; Havrlant, R.; Maxwell, M.; Hodge, W.; Christian, F.; Richards, J.; et al. The impact of a community-led program promoting weight loss and healthy living in Aboriginal communities: The New South Wales Knockout Health Challenge. *BMC Public Health* **2017**, *17*, 951.
179. Payne, C. A diabetes support group for Nywaigi women to enhance their capacity for maintaining physical and mental wellbeing. *Contemp. Nurse* **2013**, *46*, 41–45.
180. Peiris, D.; Wright, L.; News, M.; Corcoran, K. Community-based chronic disease prevention and management for Aboriginal people in New South Wales, Australia: Mixed methods evaluation of the 1 Deadly Step Program. *JMIR Mhealth Uhealth* **2019**, *7*, e14259.
181. Peiris, D.; Wright, L.; News, M.; Rogers, K.; Redfern, J.; Chow, C.; Thomas, D. A smartphone app to assist smoking cessation among Aboriginal Australians: Findings from a pilot randomized controlled trial. *JMIR Mhealth Uhealth* **2019**, *7*, e12745.
182. Pettigrew, S.; Jongenelis, M.I.; Moore, S.; Pratt, I.S. A comparison of the effectiveness of an adult nutrition education program for Aboriginal and non-Aboriginal Australians. *Soc. Sci. Med.* **2015**, *145*, 120–124.
183. Phillips, J.H.; Wigger, C.; Beissbarth, J.; McCallum, G.B.; Leach, A.; Morris, P.S. Can mobile phone multimedia messages and text messages improve clinic attendance for Aboriginal children with chronic otitis media? A randomised controlled trial. *J. Paediatr. Child Health* **2014**, *50*, 362–367.
184. Poder, N.; Khan, R.J.; Kovai, V.; Robinson, L.; Wright, D.; Spinks, M.; Heathcote, J.; Millen, E.; Welsh, K.; Bedford, K. Evaluating an Aboriginal tobacco social marketing project in Sydney, Australia. *Health Promot. J. Austr.* **2019**, *31*, 26–37.
185. Prowse, P.T.; Nagel, T. Developing an instrument for assessing fidelity of motivational care planning: The Aboriginal and Islander Mental health initiative adherence scale. *Int. J. Ment. Health Syst.* **2014**, *8*, 36.



186. Quilty, S.; Wood, L.; Scrimgeour, S.; Shannon, G.; Sherman, E.; Lake, B.; Budd, R.; Lawton, P.; Moloney, M. Addressing Profound disadvantages to improve Indigenous health and reduce hospitalisation: A collaborative community program in remote Northern Territory. *Int. J. Environ. Res. Public Health* **2019**, *16*, 4306.
187. Quinn, E.; O'Hara, B.J.; Ahmed, N.; Winch, S.; McGill, B.; Banovic, D.; Maxwell, M.; Rissel, C. Enhancing the get healthy information and coaching service for Aboriginal adults: Evaluation of the process and impact of the program. *Int. J. Equity Health* **2017**, *16*, 168.
188. Raphiphatthana, B.; Sweet, M.; Puszka, S.; Dingwall, K.; Nagel, T. Evaluation of a three-phase implementation program in enhancing e-mental health adoption within Indigenous primary healthcare organisations. *BMC Health Serv. Res.* **2020**, *20*, 576.
189. Read, C.; Mitchell, A.G.; de Dassel, J.L.; Scrine, C.; Hendrickx, D.; Bailie, R.S.; Johnston, V.; Maguire, G.P.; Schultz, R.; Carapetis, J.R.; et al. Qualitative evaluation of a complex intervention to improve rheumatic heart disease secondary prophylaxis. *J. Am. Heart Assoc.* **2018**, *7*, e009376.
190. Reath, J.; Carey, M. Breast and cervical cancer in indigenous women-overcoming barriers to early detection. *Aust. Fam. Physician.* **2008**, *37*, 178–182.
191. Reeve, C.; Banfield, S.; Thomas, A.; Reeve, D.; Davis, S. Community outreach midwifery-led model improves antenatal access in a disadvantaged population. *Aust. J. Rural. Health* **2016**, *24*, 200–206.
192. Reeve, C.; Humphreys, J.; Wakerman, J.; Carter, M.; Carroll, V.; Reeve, D. Strengthening primary health care: Achieving health gains in a remote region of Australia. *Med. J. Aust.* **2015**, *202*, 483–487.
193. Reeve, C.; Thomas, A.; Mossenson, A.; Reeve, D.; Davis, S. Evaluation of an ear health pathway in remote communities: Improvements in ear health access. *Aust. J. Rural. Health* **2014**, *22*, 127–132.
194. Reilly, R.E.; Cincotta, M.; Doyle, J.; Firebrace, B.R.; Cargo, M.; van den Tol, G.; Morgan-Bulled, D.; Rowley, K.G. A pilot study of Aboriginal health promotion from an ecological perspective. *BMC Public Health* **2011**, *11*, 749.
195. Ritchie, B.K.; Brewster, D.R.; Tran, C.D.; Davidson, G.P.; McNeil, Y.; Butler, R.N. Efficacy of Lactobacillus GG in aboriginal children with acute diarrhoeal disease: A randomised clinical trial. *J. Pediatr. Gastroenterol. Nutr.* **2010**, *50*, 619–624.
196. Roberts, K.; Cannon, J.; Atkinson, D.; Brown, A.; Maguire, G.; Remenyi, B.; Wheaton, G.; Geelhoed, E.; Carapetis, J.R. Echocardiographic screening for rheumatic heart disease in Indigenous Australian children: A cost-utility analysis. *J. Am Heart Assoc.* **2017**, *6*, e004515.
197. Robertson, J.; Pointing, B.S.; Stevenson, L.; Clough, A.R. “We made the rule, we have to stick to it”: Towards effective management of environmental tobacco smoke in remote Australian Aboriginal communities. *Int. J. Environ. Res. Public Health* **2013**, *10*, 4944–4966.
198. Roberts-Thomson, K.F.; Ha, D.H.; Wooley, S.; Meihubers, S.; Do, L.G. Community trial of silver fluoride treatment for deciduous dentition caries in remote Indigenous communities. *Aust. Dent. J.* **2019**, *64*, 175–180.
199. Roberts-Thomson, K.F.; Slade, G.D.; Bailie, R.S.; Endean, C.; Simmons, B.; Leach, A.J.; Raye, I.; Morris, P.S. A comprehensive approach to health promotion for the reduction of dental caries in remote Indigenous Australian children: A clustered randomised controlled trial. *Int. Dent. J.* **2010**, *60*, 245–249.
200. Robinson, G.W.; Lee, E.; Silburn, S.R.; Nagel, P.; Leckning, B.; Midford, R. School-based prevention in very remote settings: A feasibility trial of methods and measures for the evaluation of a social emotional learning program for Indigenous students in remote Northern Australia. *Front. Public Health* **2020**, *17*, e552878.
201. Schmidt, B.; Campbell, S.; McDermott, R. Community health workers as chronic care coordinators: Evaluation of an Australian Indigenous primary health care program. *Aust. N. Z. J. Public Health* **2016**, *40* (Suppl S1), S107–S114.
202. Schultz, R. Prevalences of overweight and obesity among children in remote Aboriginal communities in central Australia. *Rural. Remote Health* **2012**, *12*, 68–74.
203. Seear, K.H.; Atkinson, D.N.; Henderson-Yates, L.M.; Lelievre, M.P.; Marley, J.V. Maboo wirriya, be healthy: Community-directed development of an evidence-based diabetes prevention program for young Aboriginal people in a remote Australian town. *Eval. Program. Plann.* **2020**, *81*, e101818.
204. Segal, L.; Nguyen, H.; Schmidt, B.; Wenitong, M.; McDermott, R.A. Economic evaluation of Indigenous health worker management of poorly controlled type 2 diabetes in north Queensland. *Med. J. Aust.* **2016**, *204*, 196.
205. Shephard, M.; O'Brien, C.; Burgoyne, A.; Croft, J.; Garlett, T.; Barancek, K.; Halls, H.; McAteer, B.; Motta, L.; Shephard, A. Review of the cultural safety of a national Indigenous point-of-care testing program for diabetes management. *Aust. J. Prim. Health* **2016**, *22*, 368–374.
206. Shephard, M.; Shephard, A.; McAteer, B.; Regnier, T.; Barancek, K. Results from 15years of quality surveillance for a National Indigenous Point-of-Care Testing Program for diabetes. *Clin. Biochem.* **2017**, *50*, 1159–1163.

207. Shield, J.M.; Kearns, T.M.; Garenggulkpuy, J.; Walpulay, L.; Gundjirryirr, R.; Bundhala, L.; Djarpanbuluwuy, V.; Andrews, R.M.; Judd, J. Cross-cultural, Aboriginal language, discovery education for health literacy and informed consent in a remote Aboriginal community in the Northern Territory, Australia. *Trop. Med. Infect. Dis.* **2018**, *3*, 15.
208. Sinclair, C.; Stokes, A.; Jeffries-Stokes, C.; Daly, J. Positive community responses to an arts-health program designed to tackle diabetes and kidney disease in remote Aboriginal communities in Australia: A qualitative study. *Aust. N. Z. J. Public Health* **2016**, *40*, 307–312.
209. Slade, G.D.; Bailie, R.S.; Roberts-Thomson, K.; Leach, A.J.; Raye, I.; Endean, C.; Simmons, B.; Morris, P. Effect of health promotion and fluoride varnish on dental caries among Australian Aboriginal children: Results from a community-randomized controlled trial. *Community Dent. Oral. Epidemiol.* **2011**, *39*, 29–43.
210. Smith, A.C.; Armfield, N.R.; Wu, W.I.; Brown, C.A.; Mickan, B.; Perry, C. Changes in paediatric hospital ENT service utilisation following the implementation of a mobile, indigenous health screening service. *J. Telemed. Telecare* **2013**, *19*, 397–400.
211. Smith, A.C.; Armfield, N.R.; Wu, W.; Brown, C.A.; Perry, C. A mobile telemedicine-enabled ear screening service for Indigenous children in Queensland: Activity and outcomes in the first three years. *J. Telemed. Telecare* **2012**, *18*, 485–489.
212. Smith, A.C.; Brown, C.; Bradford, N.; Caffery, L.J.; Perry, C.; Armfield, N.R. Monitoring ear health through a telemedicine-supported health screening service in Queensland. *J. Telemed. Telecare* **2015**, *21*, 427–430.
213. Smith, L.; Blinkhorn, F.; Moir, R.; Blinkhorn, A. Results of a two year dental health education program to reduce dental caries in young Aboriginal children in New South Wales, Australia. *Community Dent. Health* **2018**, *35*, 211–216.
214. Smithers, L.G.; Lynch, J.; Hedges, J.; Jamieson, L.M. Diet and anthropometry at 2 years of age following an oral health promotion programme for Australian Aboriginal children and their carers: A randomised controlled trial. *Br. J. Nutr.* **2017**, *118*, 1061–1069.
215. Snodgrass, W.J.; Rayner, V.; Rice, S.M.; Purcell, R.; Bowers, J. Evaluation of a culturally sensitive social and emotional well-being program for Aboriginal and Torres Strait Islanders. *Aust. J. Rural. Health* **2020**, *28*, 327–337.
216. Soares, G.H.; Santiago, P.H.R.; Biazevic, M.G.H.; Michel-Crosato, E.; Jamieson, L. Do network centrality measures predict dental outcomes of Indigenous children over time? *Int. J. Paediatr. Dent.* **2020**, *31*, 634–646.
217. Spaeth, B.A.; Shephard, M.D.; Schatz, S. Point-of-care testing for haemoglobin A1c in remote Australian Indigenous communities improves timeliness of diabetes care. *Rural. Remote Health* **2014**, *14*, 136–140.
218. Spurling, G.K.; Askew, D.A.; Schluter, P.J.; Hayman, N.E. Implementing computerised Aboriginal and Torres Strait Islander health checks in primary care for clinical care and research: A process evaluation. *BMC Med. Inform. Decis. Mak.* **2013**, *13*, 108.
219. Spurling, G.K.; Hayman, N.E.; Cooney, A.L. Adult health checks for Indigenous Australians: The first years' experience from the Inala Indigenous Health Service. *Med. J. Aust.* **2009**, *190*, 562–564.
220. Standen, J.C.; Morgan, G.G.; Sowerbutts, T.; Blazek, K.; Gugusheff, J.; Puntsag, O.; Wollan, M.; Torzillo, P. Prioritising housing maintenance to improve health in Indigenous communities in NSW over 20 years. *Int. J. Environ. Res. Public Health* **2020**, *17*, 5946.
221. Stanley, S.H.; Laugharne, J.; Chapman, M.; Balaratnasingam, S. The physical health of Indigenous people with a mental illness in the Kimberley: Is ongoing monitoring effective? *Australas Psychiatr.* **2019**, *27*, 358–361.
222. Stephen, A.T.; Leach, A.J.; Morris, P.S. Impact of swimming on chronic suppurative otitis media in Aboriginal children: A randomised controlled trial. *Med. J. Aust.* **2013**, *199*, 51–55.
223. Sun, J.; Buys, N. Effects of community singing program on mental health outcomes of Australian Aboriginal and Torres Strait Islander people: A meditative approach. *Am. J. Health Promot.* **2016**, *30*, 259–263.
224. Tan, J.K.; Kearns, P.; Martin, A.C.; Siafarikas, A. Randomised controlled trial of daily versus stoss vitamin D therapy in Aboriginal children. *J. Paediatr. Child Health* **2015**, *51*, 626–631.
225. Tane, M.P.; Hefler, M.; Thomas, D.P. An evaluation of the 'Yaka ENGarali' Tackling Indigenous Smoking program in East Arnhem Land: Yol engu people and their connection to engarali'. *Health Promot. J. Austr.* **2018**, *29*, 10–17.
226. Thomas, D.P.; McMahon, E.; Wang, Z.; Scollo, M.M.; Durkin, S.J. Impact of three annual tobacco tax rises on tobacco sales in remote Australian Aboriginal community stores. *Tob. Control.* **2020**, *30*, e122–e127.
227. Thomas, D.; Johnston, V.; Fitz, J. Lessons for Aboriginal tobacco control in remote communities: An evaluation of the Northern Territory 'Tobacco Project'. *Aust. N. Z. J. Public Health* **2010**, *34*, 45–49.
228. Thomas, P.; Joseph, T.L.; Menzies, R.I. Evaluation of a targeted immunisation program for Aboriginal and Torres Strait Islander infants in an urban setting. *NSW Public Health Bull.* **2008**, *19*, 96–99.

229. Thornton, R.B.; Kirkham, L.S.; Corscadden, K.J.; Coates, H.L.; Vijayasekaran, S.; Hillwood, J.; Toster, S.; Edminston, P.; Zhang, G.; Keil, A.; et al. No evidence for impaired humoral immunity to pneumococcal proteins in Australian Aboriginal children with otitis media. *Int. J. Pediatr. Otorhinolaryngol.* **2017**, *92*, 119–125.
230. Thornton, R.B.; Kirkham, L.S.; Corscadden, K.J.; Wiertsema, S.P.; Fuery, A.; Jones, B.J.; Coates, H.L.; Vijayasekaran, S.; Zhang, G.; Keil, A.; et al. Australian Aboriginal Children with otitis media have reduced antibody titers to specific nontypeable haemophilus influenzae vaccine antigens. *Clin. Vaccine Immunol.* **2017**, *24*, e00556-16.
231. Tighe, J.; Shand, F.; Ridani, R.; Mackinnon, A.; De La Mata, N.; Christensen, H. Ibbobly mobile health intervention for suicide prevention in Australian Indigenous youth: A pilot randomised controlled trial. *BMJ Open* **2017**, *7*, e013518.
232. Tong, S.Y.; Andrews, R.M.; Kearns, T.; Gundjirryirr, R.; McDonald, M.I.; Currie, B.J.; Carapetis, J.R. Trimethopim-sulfamethoxazole compared with benzathine penicillin for treatment of impetigo in Aboriginal children: A pilot randomised controlled trial. *J. Paediatr. Child Health* **2010**, *46*, 131–133.
233. Treloar, C.; Hopwood, M.; Cama, E.; Saunders, V.; Jackson, L.C.; Walker, M.; Ooi, C.; Ubrihien, A.; Ward, J. Evaluation of the Deadly Liver Mob program: Insights for roll-out and scale-up of a pilot program to engage Aboriginal Australians in hepatitis C and sexual health education, screening, and care. *Harm. Reduct. J.* **2018**, *15*, 5.
234. Valery, P.C.; Masters, I.B.; Taylor, B.; Laifoo, Y.; O'Rourke, P.K.; Chang, A.B. An education intervention for childhood asthma by Aboriginal and Torres Strait Islander health workers: A randomised controlled trial. *Med. J. Aust.* **2010**, *192*, 574–579.
235. Vallesi, S.; Wood, L.; Dimer, L.; Zada, M. "In Their Own Voice"—Incorporating underlying social determinants into Aboriginal health promotion programs. *Int. J. Environ. Res. Public Health* **2018**, *15*, 1514.
236. Ward, J.S.; Dyda, A.; McGregor, S.; Rumbold, A.; Garton, L.; Donovan, B.; Kaldor, J.M.; Guy, R.J. Low HIV testing rates among people with a sexually transmissible infection diagnosis in remote Aboriginal communities. *Med. J. Aust.* **2016**, *205*, 168–171.
237. Ward, J.S.; Guy, R.J.; Akre, S.P.; Wand, H.; McManus, H.; Dyda, A.; Garton, L.; Hengel, B.; Silver, B.J.; Taylor-Thomson, D.; et al. Epidemiology of syphilis in Australia: Moving toward elimination of infectious syphilis from remote Aboriginal and Torres Strait Islander communities? *Med. J. Aust.* **2011**, *194*, 525–529.
238. Whiteside, M.; Tsey, K.; Crouch, A.; Fagan, P. Youth and Relationship Networks (YARNS): Mobilising communities for sexual health. *Health Promot. J. Austr.* **2012**, *23*, 226–230.
239. Xu, H.; Geros, C.; Turner, E.; Egan, M.; Cocotis, K.; Mitchell, C.; Arambasic, N.; Browne, J. Feltman: Evaluating the utilisation of an Aboriginal diabetes education tool by health professionals. *Aust. J. Prim. Health* **2018**, *24*, 496–501.
240. Young, C.; Gunasekera, H.; Kong, K.; Purcell, A.; Muthayya, S.; Vincent, F.; Wright, D.; Gordon, R.; Bell, J.; Gillor, G.; et al. A case study of enhanced clinical care enabled by Aboriginal health research: The Hearing, EAr health and Language Services (HEALS) project. *Aust. N. Z. J. Public Health* **2016**, *40*, 523–528.
